# Supplementary material for: Isolation, structural elucidation, and bioactivity of cholestane derivatives from Ypsilandra thibetica
Source: Royal Society of Chemistry journal article supplement (doi:10.1039/d2nj04576a), 2022-11-16
Supplement: d2nj04576a1.pdf [file d2nj04576a1.pdf]

## *Supplementary data*

### **Isolation, structural elucidation, and bioactivity of novel cholestane derivatives from *Ypsilandra thibetica***

Jing Xie, <sup>a,b</sup> Shi-Juan Zhang, <sup>a,b</sup> Grace Gar-Lee Yue, <sup>c,d</sup> Ling-Ling Yu, <sup>a,b</sup> Hui Liu, <sup>a</sup> Wen-Yi Ma,  
<sup>a,b</sup> Huan Yan, <sup>a</sup> Wei Ni, <sup>a</sup> Clara Bik-San Lau, <sup>c,d,\*\*</sup> Hai-Yang Liu, <sup>a,e,\*</sup>

<sup>a</sup> State Key Laboratory of Phytochemistry and Plant Resources in West China, and  
Yunnan Key Laboratory of Natural Medicinal Chemistry, Kunming Institute of  
Botany, Chinese Academy of Sciences, Kunming 650201, China

<sup>b</sup> University of Chinese Academy of Sciences, Beijing, 100049, China

<sup>c</sup> Institute of Chinese Medicine, The Chinese University of Hong Kong, Shatin, New  
Territories, Hong Kong, China

<sup>d</sup> State Key Laboratory of Research on Bioactivities and Clinical Applications of  
Medicinal Plants, The Chinese University of Hong Kong, Shatin, New Territories,  
Hong Kong, China

<sup>e</sup> Yunnan Characteristic Plant Extraction Laboratory, Kunming 650106, China

---

\* Corresponding author.

*E-mail addresses:* \*\*claralau@cuhk.edu.hk (C.-B.-S. Lau) and \*haiyangliu@mail.kib.ac.cn (H.-  
Y. Liu).

---

**Table of contents**

|                                                                                               |    |
|-----------------------------------------------------------------------------------------------|----|
| Fig. S1. <sup>1</sup> H NMR spectrum of compound <b>1</b> in pyridine-d <sub>5</sub> .....    | 4  |
| Fig. S2. <sup>13</sup> C NMR spectrum of compound <b>1</b> in pyridine-d <sub>5</sub> . ....  | 4  |
| Fig. S3. HSQC spectrum of compound <b>1</b> .....                                             | 5  |
| Fig. S4. HMBC spectrum of compound <b>1</b> .....                                             | 5  |
| Fig. S5. <sup>1</sup> H– <sup>1</sup> H COSY spectrum of compound <b>1</b> .....              | 6  |
| Fig. S6. ROESY spectrum of compound <b>1</b> . ....                                           | 6  |
| Fig. S7. HRESIMS spectrum of compound <b>1</b> . ....                                         | 7  |
| Fig. S8. IR spectrum of compound <b>1</b> .....                                               | 7  |
| Fig. S9. <sup>1</sup> H NMR spectrum of compound <b>2</b> in pyridine-d <sub>5</sub> . ....   | 8  |
| Fig. S10. <sup>13</sup> C NMR spectrum of compound <b>2</b> in pyridine-d <sub>5</sub> . .... | 8  |
| Fig. S11. HSQC spectrum of compound <b>2</b> .....                                            | 9  |
| Fig. S12. HMBC spectrum of compound <b>2</b> .....                                            | 9  |
| Fig. S13. <sup>1</sup> H– <sup>1</sup> H COSY spectrum of compound <b>2</b> .....             | 10 |
| Fig. S14. ROESY spectrum of compound <b>2</b> . ....                                          | 10 |
| Fig. S15. HRESIMS spectrum of compound <b>2</b> . ....                                        | 11 |
| Fig. S16. IR spectrum of compound <b>2</b> .....                                              | 11 |
| Fig. S17. <sup>1</sup> H NMR spectrum of compound <b>3</b> in pyridine-d <sub>5</sub> . ....  | 12 |
| Fig. S18. <sup>13</sup> C NMR spectrum of compound <b>3</b> in pyridine-d <sub>5</sub> . .... | 12 |
| Fig. S19. HSQC spectrum of compound <b>3</b> .....                                            | 13 |
| Fig. S20. HMBC spectrum of compound <b>3</b> .....                                            | 13 |
| Fig. S21. <sup>1</sup> H– <sup>1</sup> H COSY spectrum of compound <b>3</b> .....             | 14 |
| Fig. S22. ROESY spectrum of compound <b>3</b> . ....                                          | 14 |
| Fig. S23. HRESIMS spectrum of compound <b>3</b> . ....                                        | 15 |
| Fig. S24. IR spectrum of compound <b>3</b> .15                                                |    |
| Fig. S25. <sup>1</sup> H NMR spectrum of compound <b>4</b> in pyridine-d <sub>5</sub> .....   | 16 |
| Fig. S26. <sup>13</sup> C NMR spectrum of compound <b>4</b> in pyridine-d <sub>5</sub> . .... | 16 |
| Fig. S27. HSQC spectrum of compound <b>4</b> .....                                            | 17 |
| Fig. S28. HMBC spectrum of compound <b>4</b> .....                                            | 17 |

---

|                                                                                      |    |
|--------------------------------------------------------------------------------------|----|
| Fig.S29. $^1\text{H}$ - $^1\text{H}$ COSY spectrum of compound <b>4</b> .....        | 18 |
| Fig. S30. ROESY spectrum of compound <b>4</b> .....                                  | 18 |
| Fig. S31. HRESIMS spectrum of compound <b>4</b> .....                                | 19 |
| Fig. S32. IR spectrum of compound <b>4</b> .....                                     | 19 |
| Fig. S33. $^1\text{H}$ NMR spectrum of compound <b>5</b> in pyridine- $d_5$ .....    | 20 |
| Fig. S34. $^{13}\text{C}$ NMR spectrum of compound <b>5</b> in pyridine- $d_5$ ..... | 20 |
| Fig. S35. HSQC spectrum of compound <b>5</b> .....                                   | 21 |
| Fig. S36. HMBC spectrum of compound <b>5</b> .....                                   | 21 |
| Fig. S37. $^1\text{H}$ - $^1\text{H}$ COSY spectrum of compound <b>5</b> .....       | 22 |
| Fig. S38. ROESY spectrum of compound <b>5</b> .....                                  | 22 |
| Fig. S39. HRESIMS spectrum of compound <b>5</b> .....                                | 23 |
| Fig. S40. IR spectrum of compound <b>5</b> .....                                     | 23 |
| Fig. S41. Acid hydrolysis of compound <b>5</b> .....                                 | 24 |
| Table S1. X-ray crystallographic data for <b>1</b> .....                             | 24 |
| Table S2. X-ray crystallographic data for <b>2</b> .....                             | 25 |
| Table S3. X-ray crystallographic data for <b>3</b> .....                             | 26 |

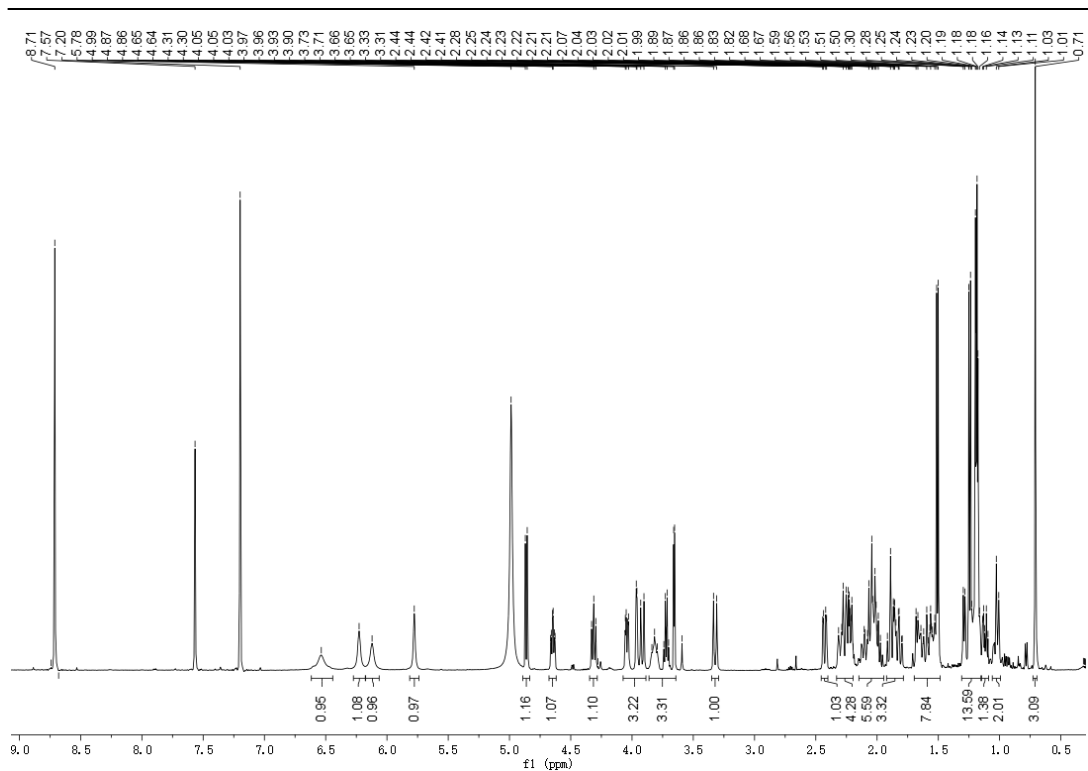Fig. S1.  $^1\text{H}$  NMR spectrum of compound **1** in pyridine- $\text{d}_5$ .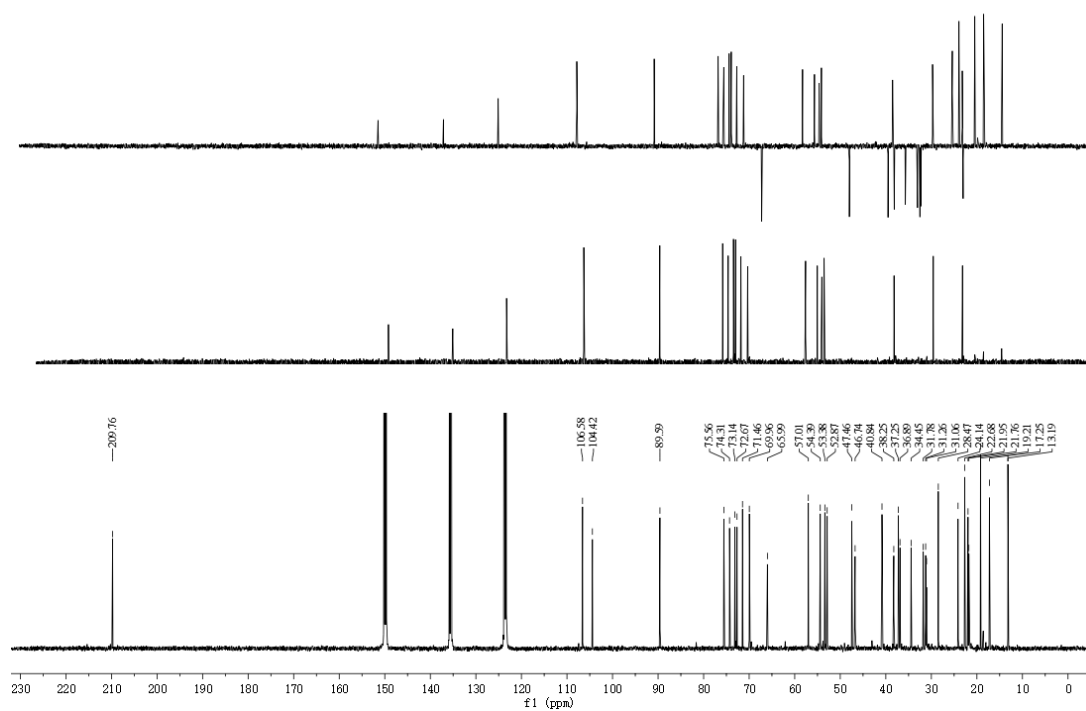Fig. S2.  $^{13}\text{C}$  NMR spectrum of compound **1** in pyridine- $\text{d}_5$ .

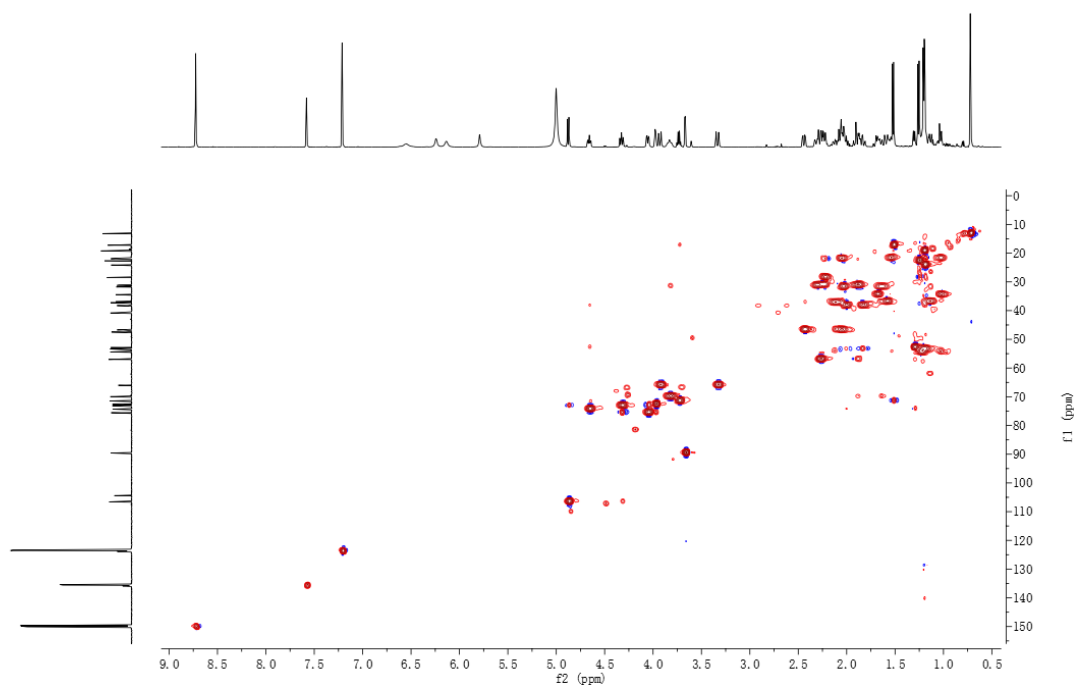

Fig. S3. HSQC spectrum of compound 1.

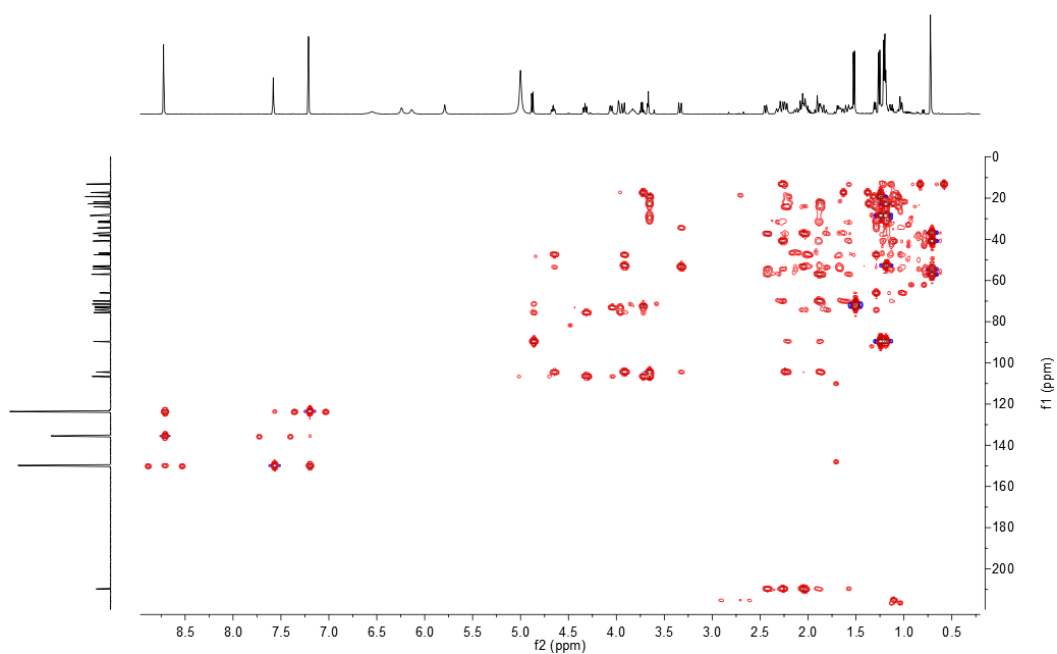

Fig. S4. HMBC spectrum of compound 1.

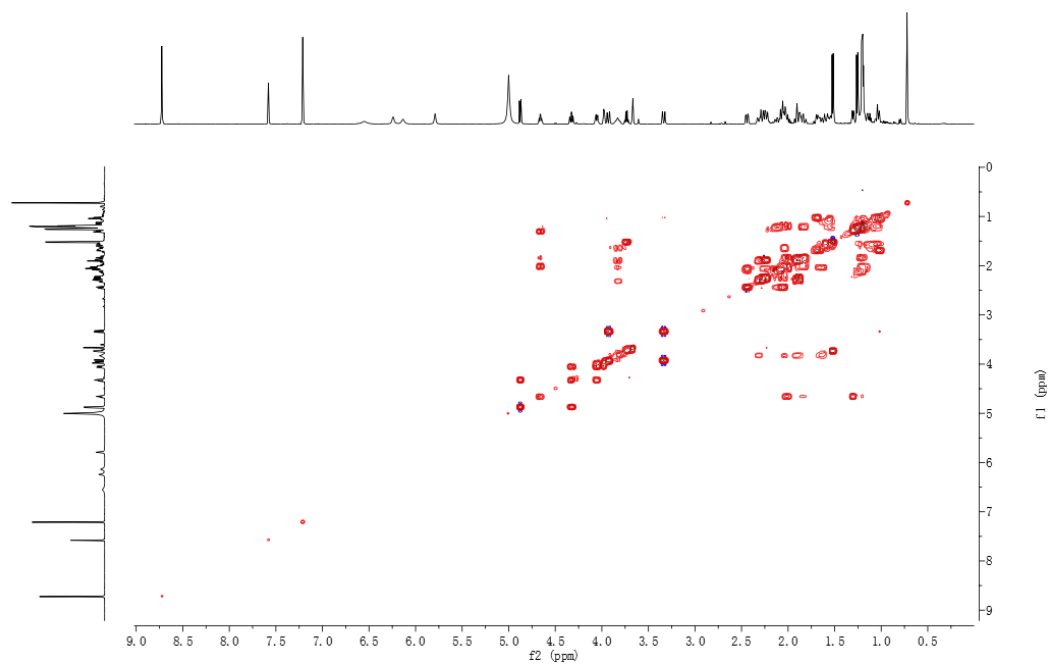

Fig. S5.  $^1\text{H}$ - $^1\text{H}$  COSY spectrum of compound 1.

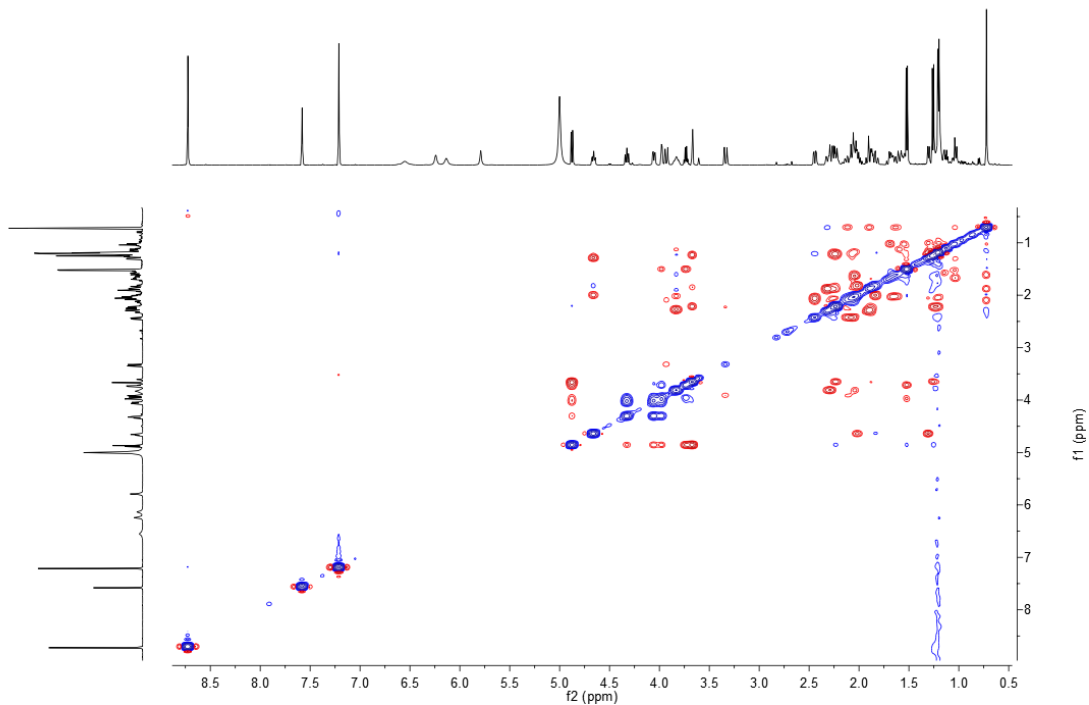

Fig. S6. ROESY spectrum of compound 1.

## User Spectra

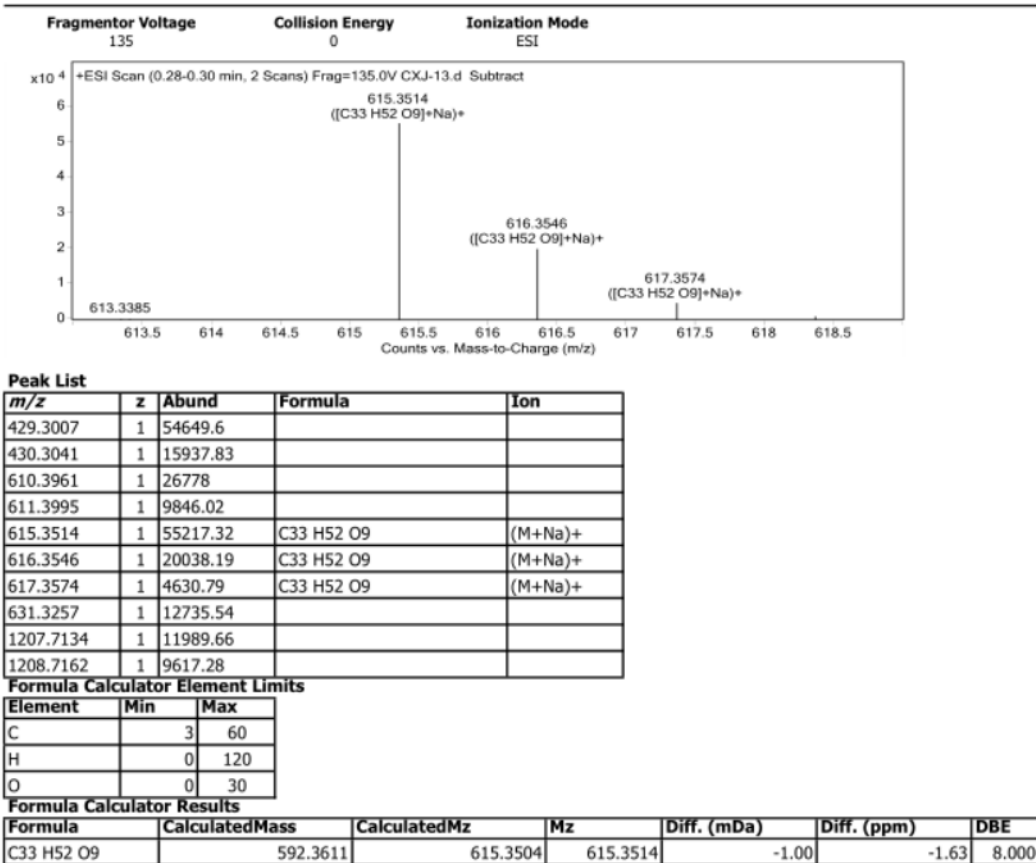

Fig. S7. HRESIMS spectrum of compound 1.

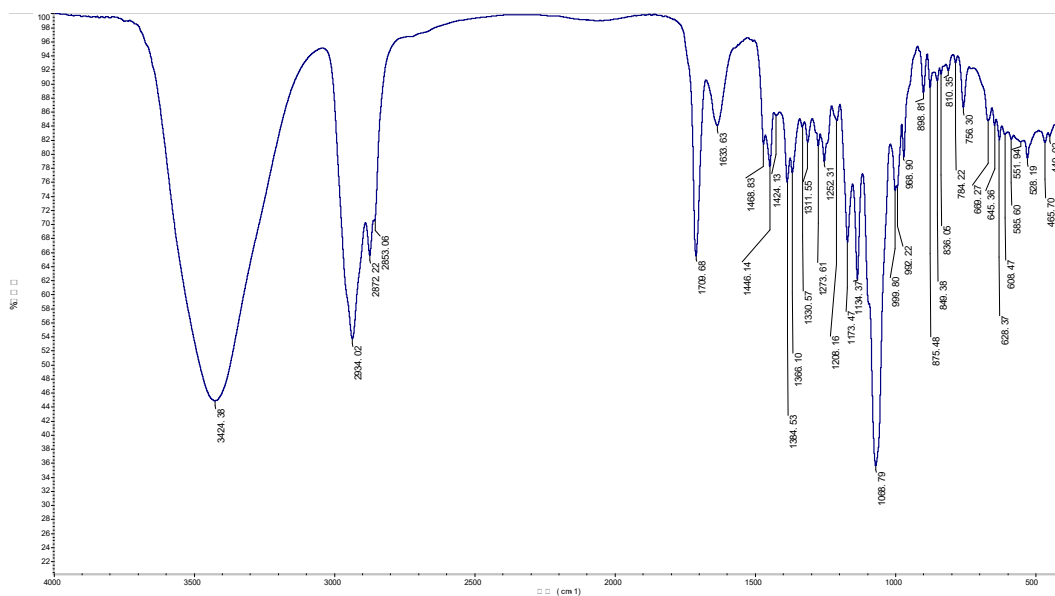

Fig. S8. IR spectrum of compound 1.

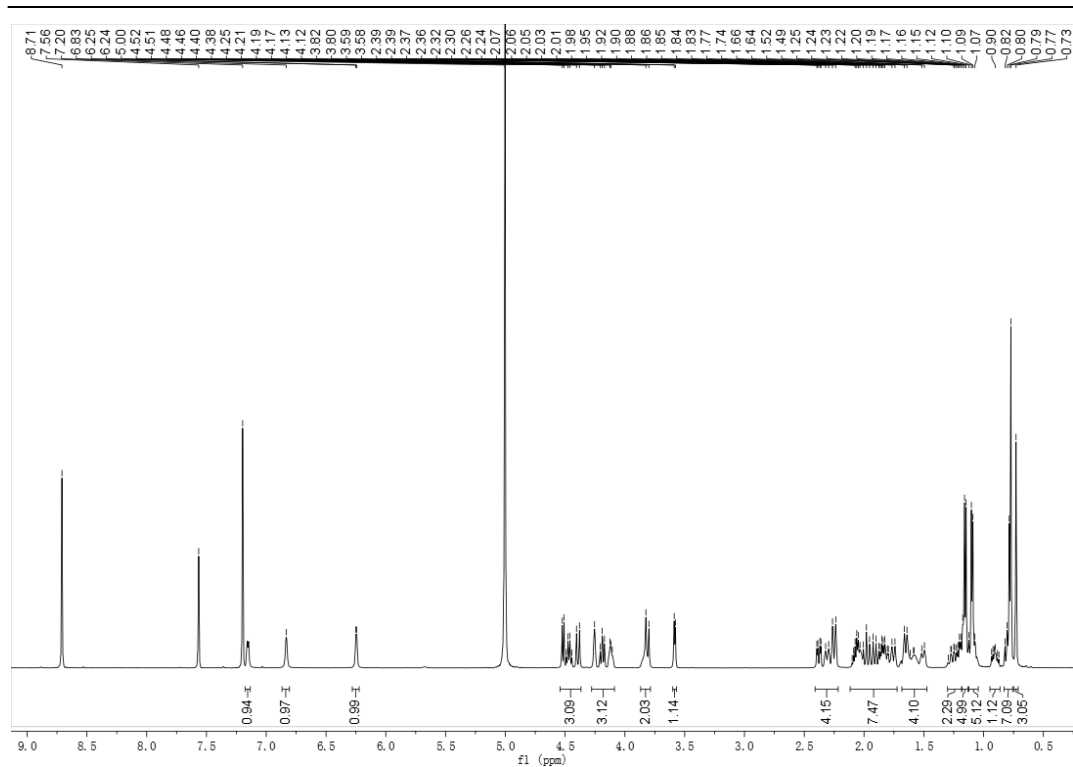

Fig. S9.  $^1\text{H}$  NMR spectrum of compound **2** in pyridine- $d_5$ .

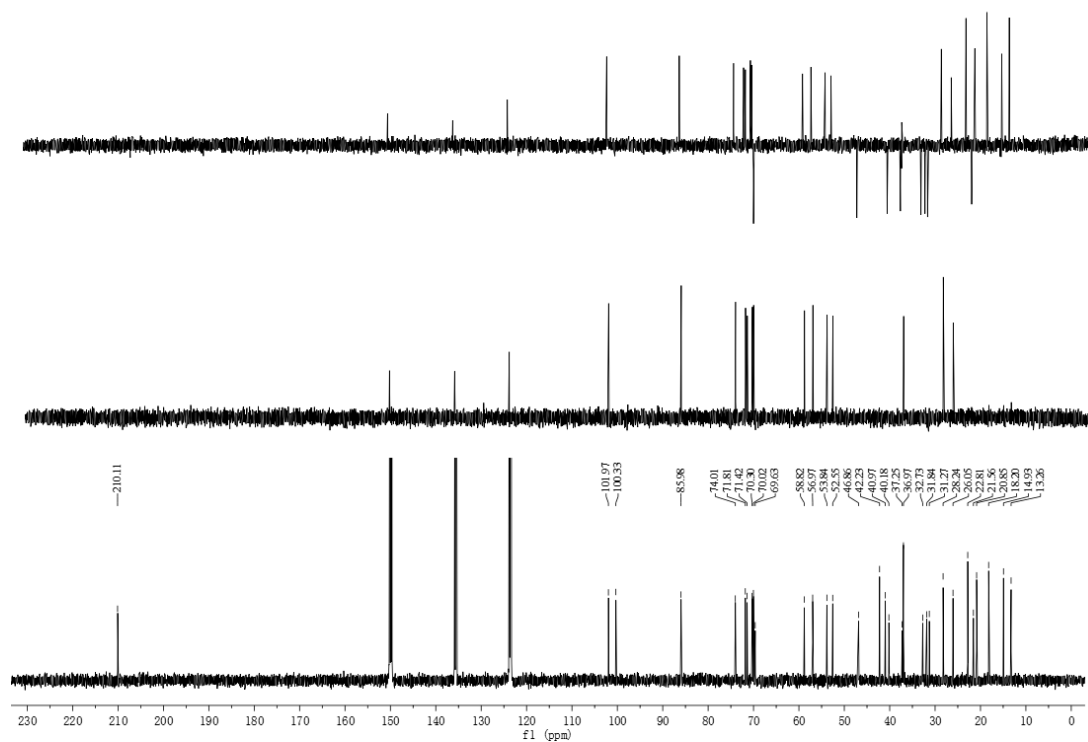

Fig. S10.  $^{13}\text{C}$  NMR spectrum of compound **2** in pyridine- $d_5$ .



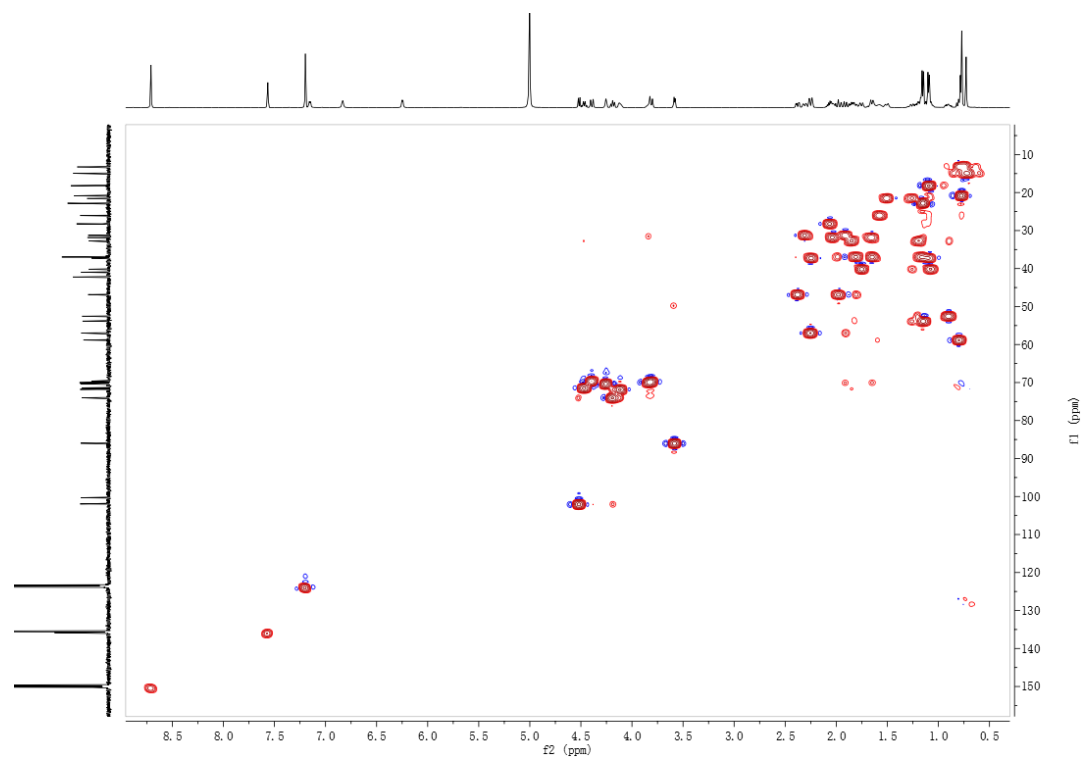

Fig. S11. HSQC spectrum of compound 2.

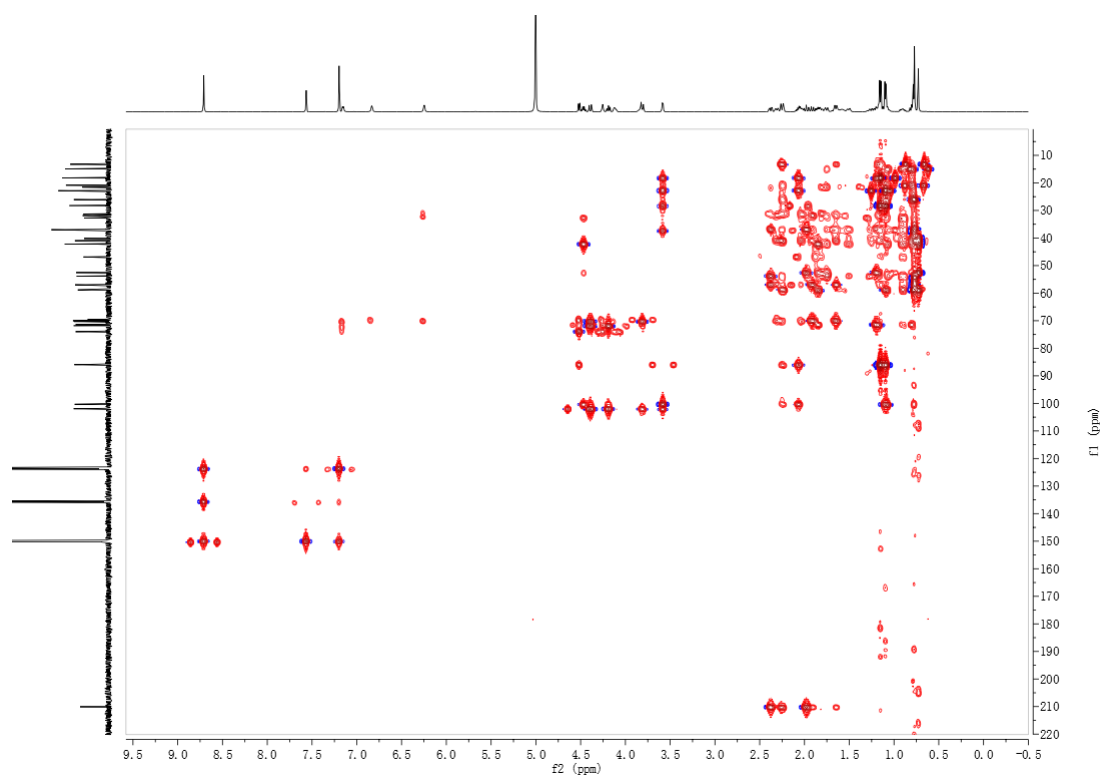

Fig. S12. HMBC spectrum of compound 2.

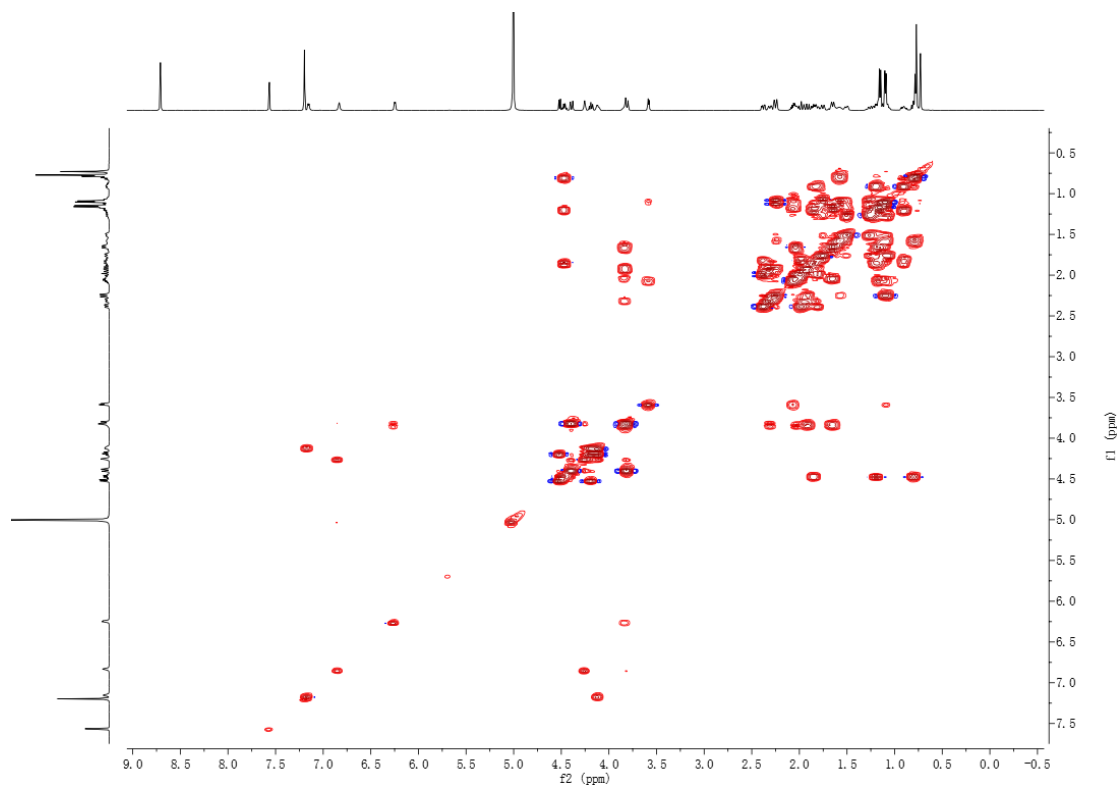

Fig. S13.  $^1\text{H}$ - $^1\text{H}$  COSY spectrum of compound 2.

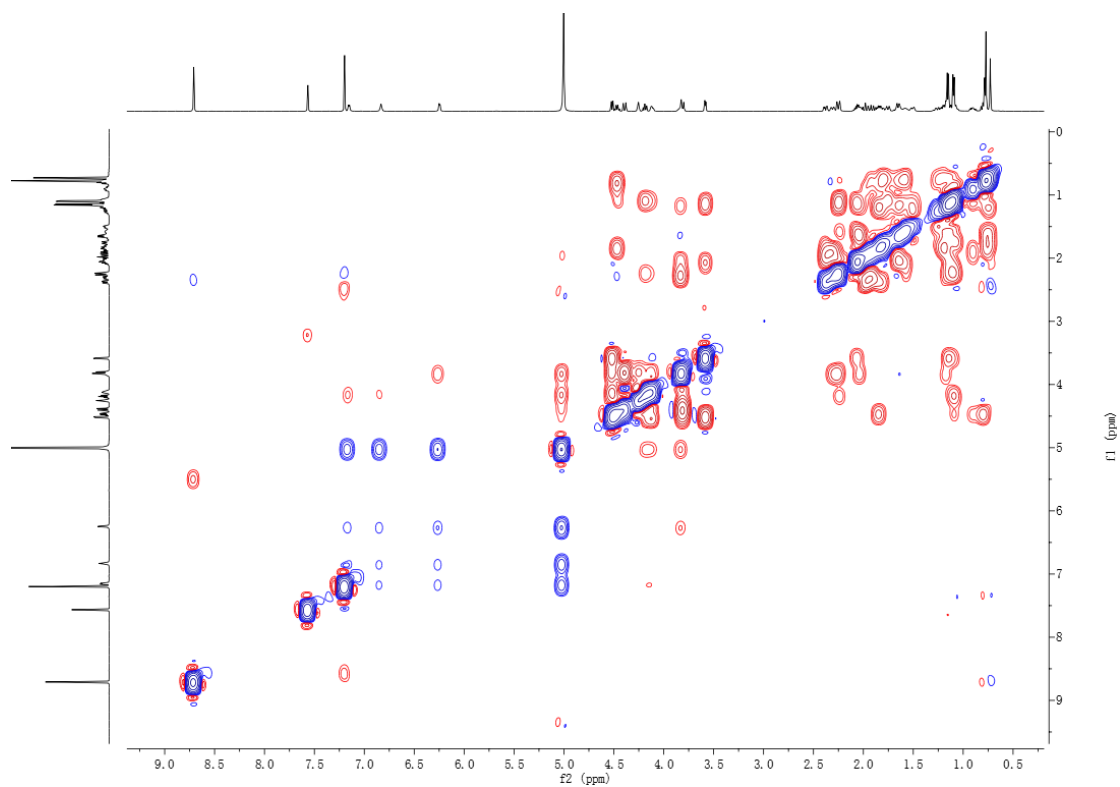

Fig. S14. ROESY spectrum of compound 2.

User Spectra

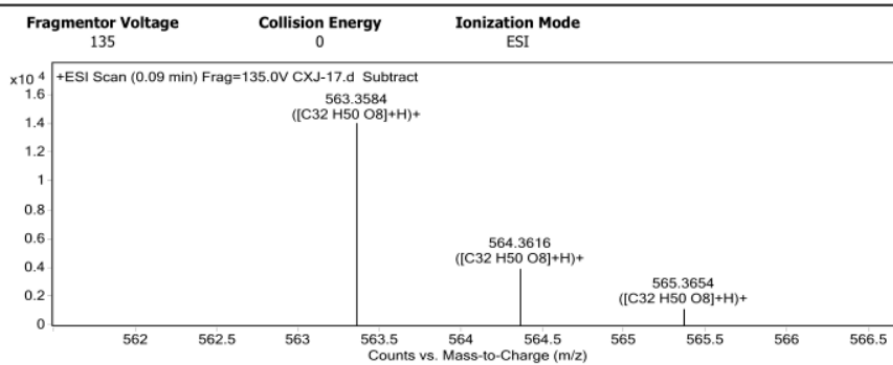

Peak List

| m/z      | z | Abund   | Formula    | Ion    |
|----------|---|---------|------------|--------|
| 61.0083  |   | 995.78  |            |        |
| 89.5071  | 2 | 1549.17 |            |        |
| 102.0544 |   | 767.07  |            |        |
| 122.0807 |   | 785.94  |            |        |
| 124.0867 |   | 2967.83 |            |        |
| 413.3028 | 1 | 918.51  |            |        |
| 563.3584 | 1 | 14097   | C32 H50 O8 | (M+H)+ |
| 564.3616 | 1 | 4000.51 | C32 H50 O8 | (M+H)+ |
| 565.3654 | 1 | 1201.51 | C32 H50 O8 | (M+H)+ |
| 585.3418 |   | 719.16  |            |        |

Formula Calculator Element Limits

| Element | Min | Max |
|---------|-----|-----|
| C       | 3   | 60  |
| H       | 0   | 120 |
| O       | 0   | 30  |

Formula Calculator Results

| Formula    | CalculatedMass | CalculatedMz | Mz       | Diff. (mDa) | Diff. (ppm) | DBE    |
|------------|----------------|--------------|----------|-------------|-------------|--------|
| C32 H50 O8 | 562.3506       | 563.3578     | 563.3584 | -0.60       | -1.07       | 8.0000 |

Fig. S15. HRESIMS spectrum of compound 2.

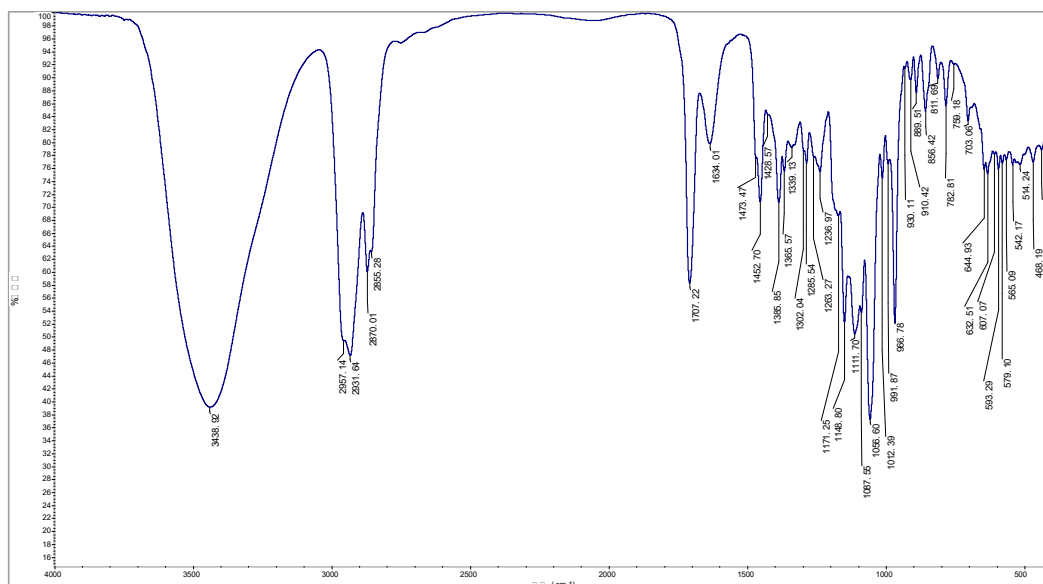

Fig. S16. IR spectrum of compound 2.

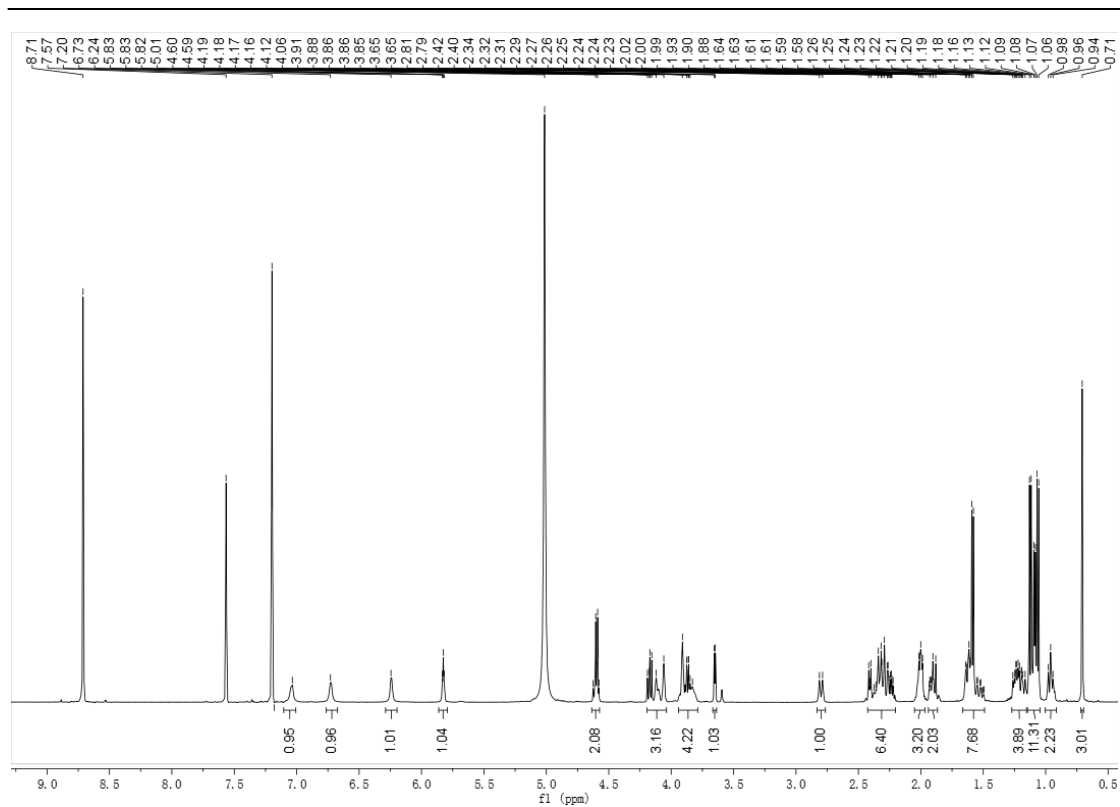

Fig. S17.  $^1\text{H}$  NMR spectrum of compound **3** in pyridine- $d_5$ .

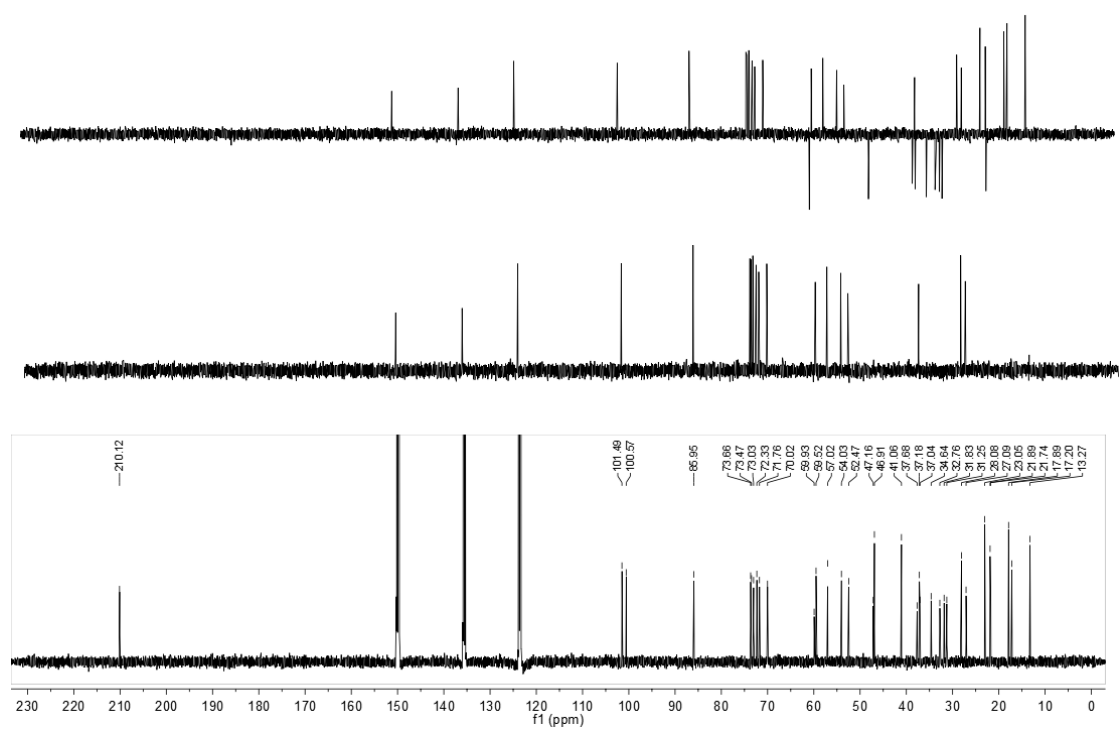

Fig. S18.  $^{13}\text{C}$  NMR spectrum of compound **3** in pyridine- $d_5$ .

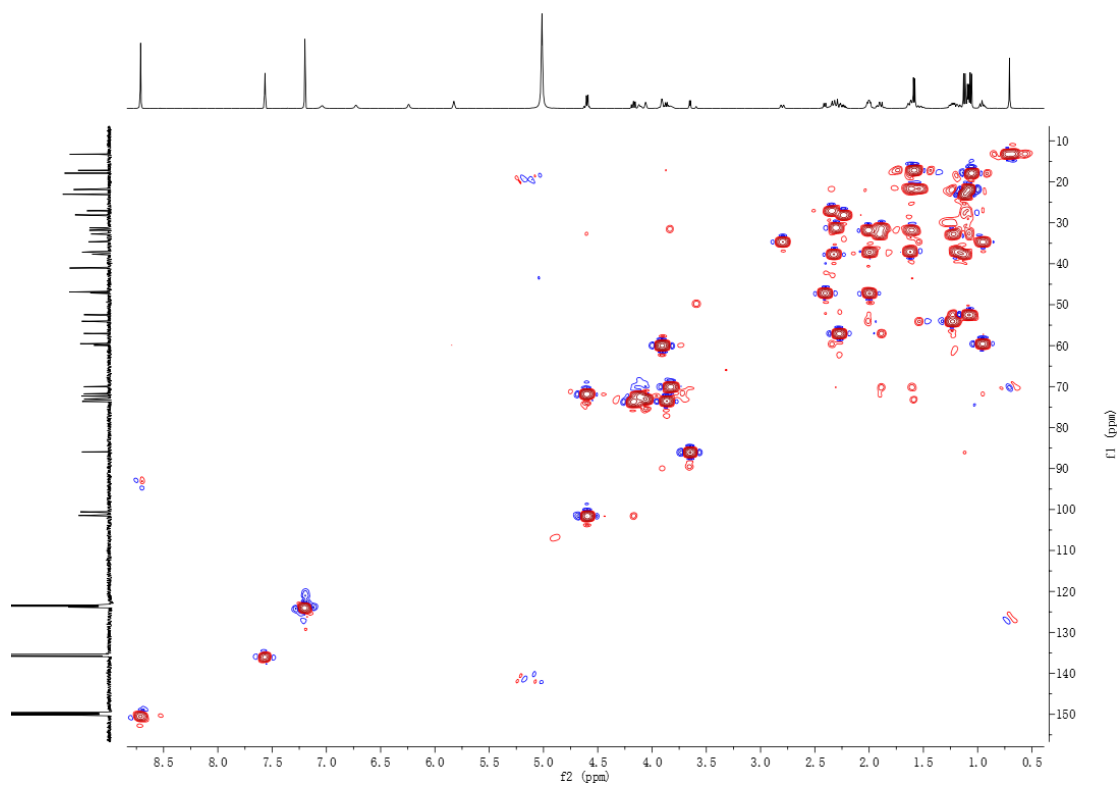

Fig. S19. HSQC spectrum of compound 3.

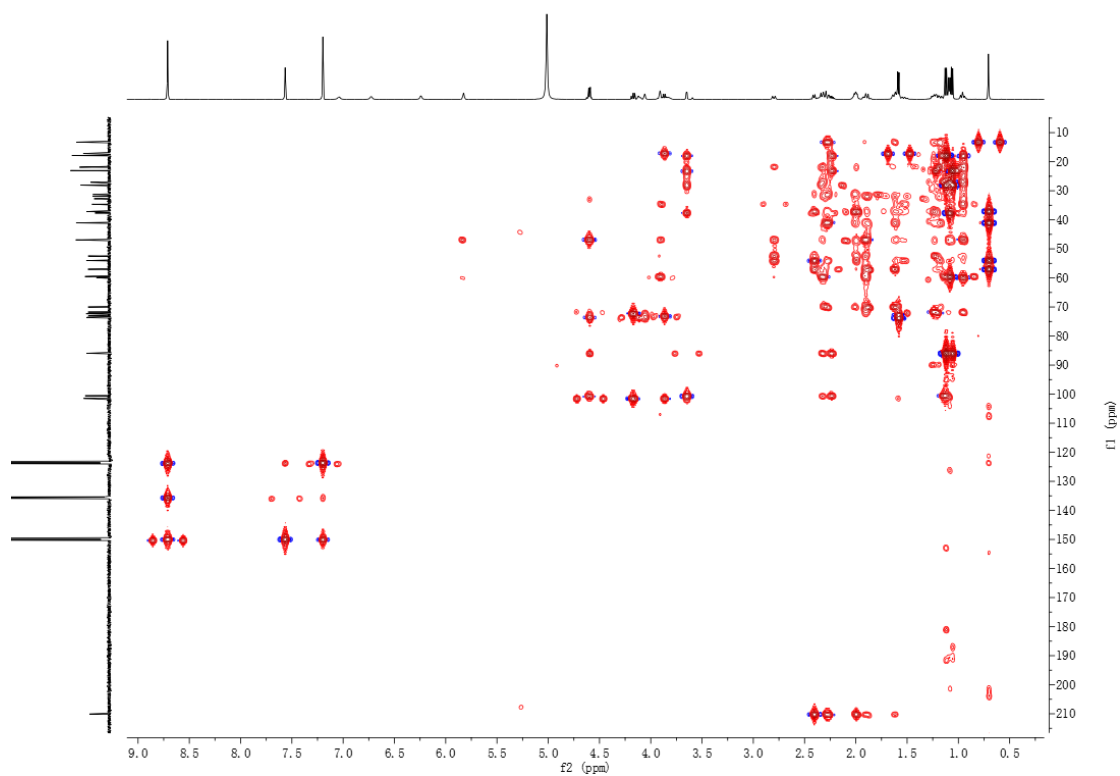

Fig. S20. HMBC spectrum of compound 3.

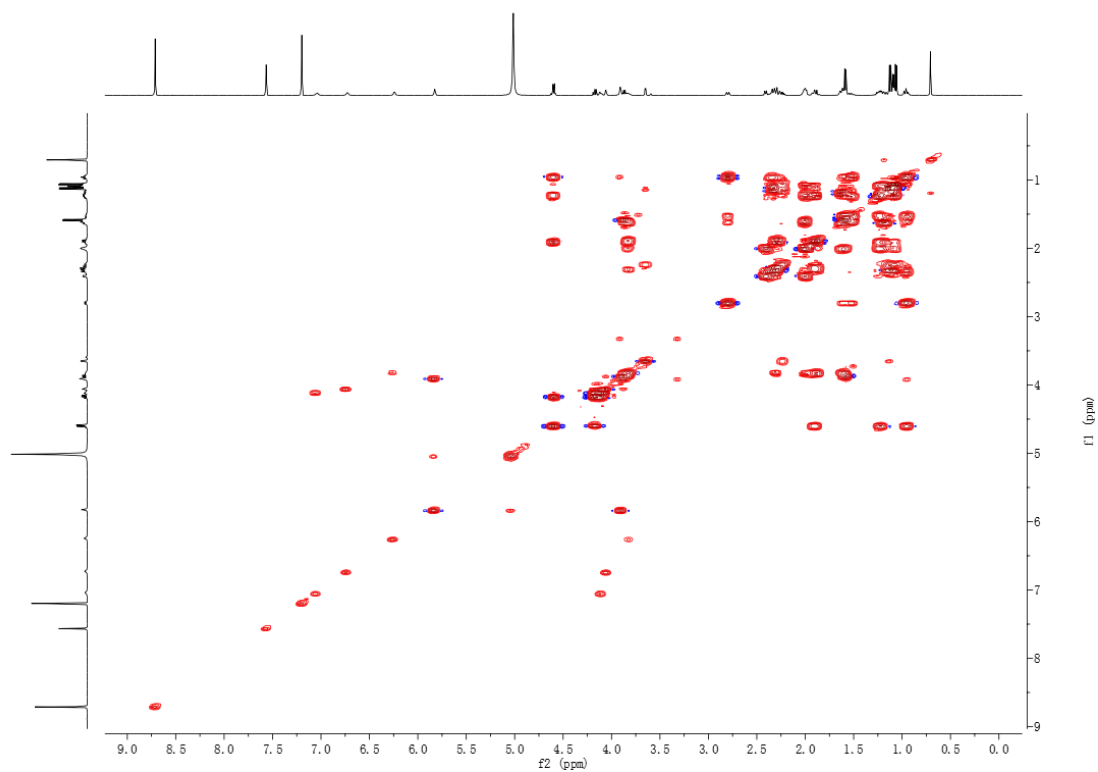

Fig. S21.  $^1\text{H}$ - $^1\text{H}$  COSY spectrum of compound 3.

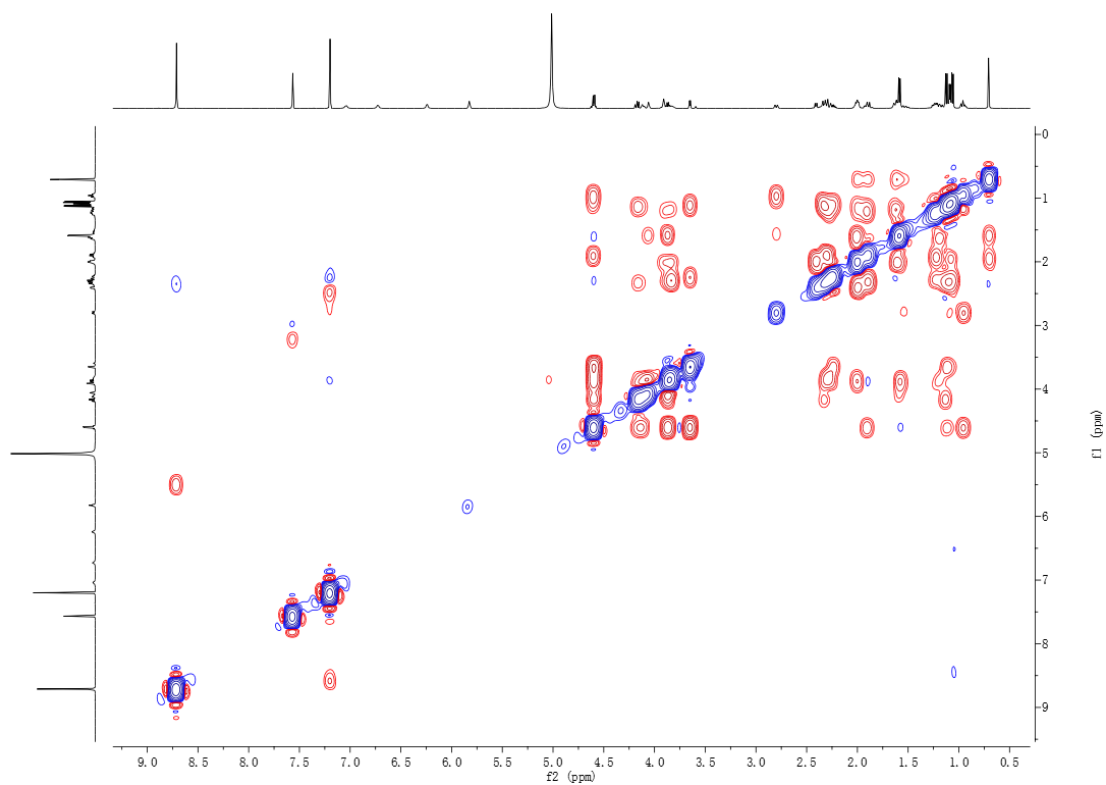

Fig. S22. ROESY spectrum of compound 3.

## User Spectra

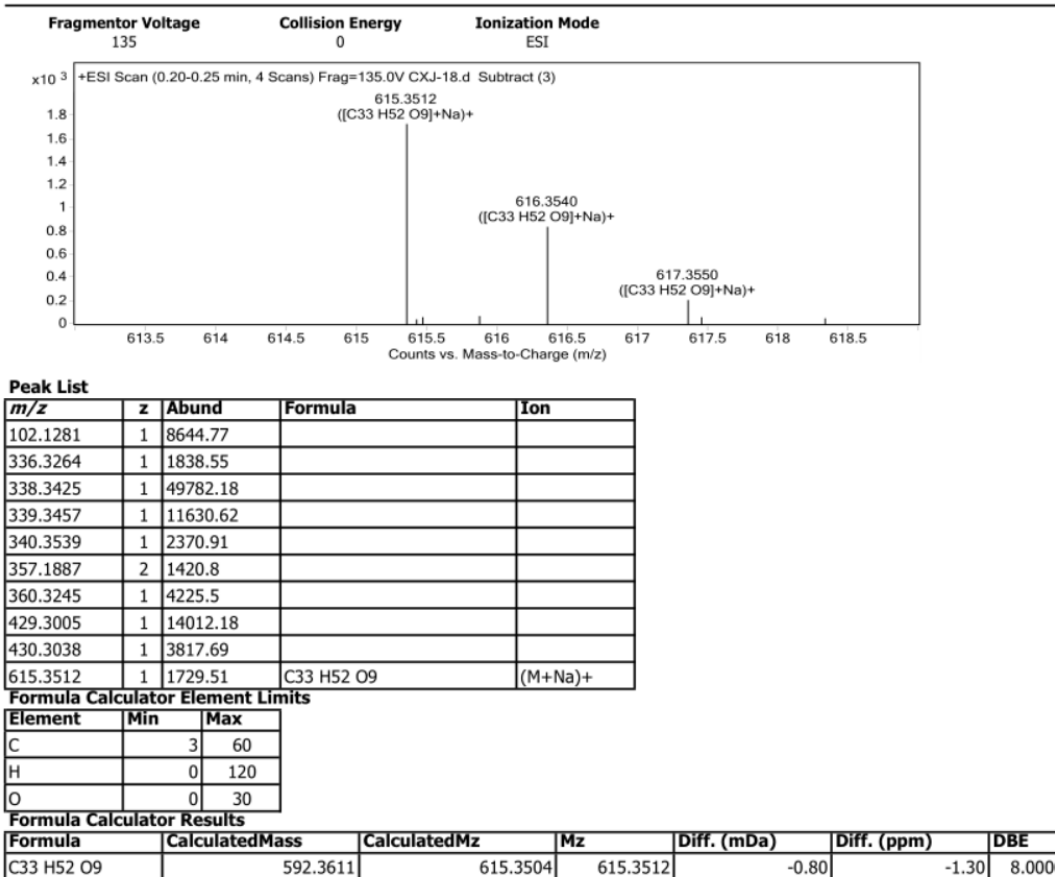

Fig. S23. HRESIMS spectrum of compound 3.

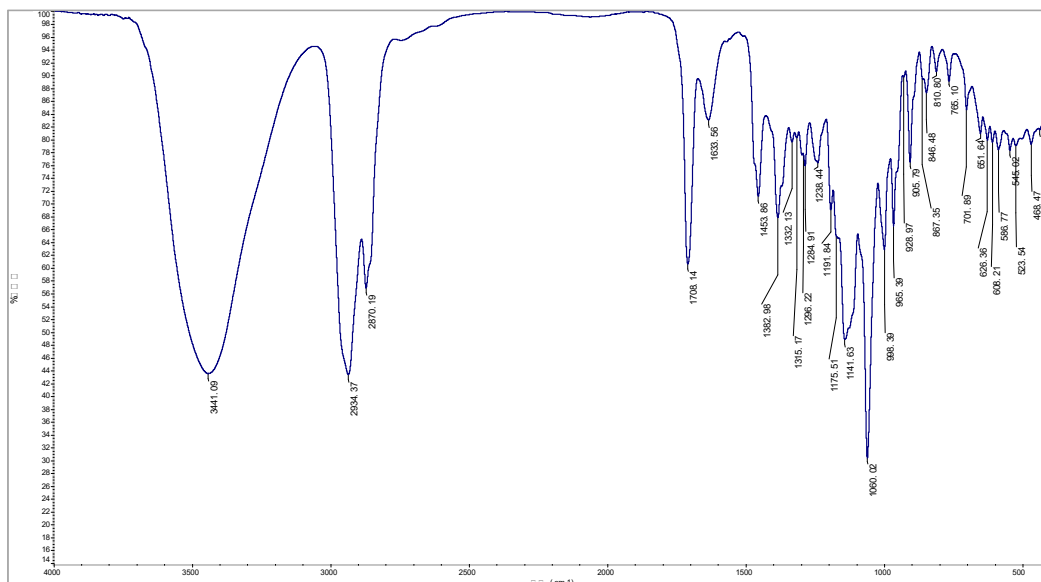

Fig. S24. IR spectrum of compound 3.

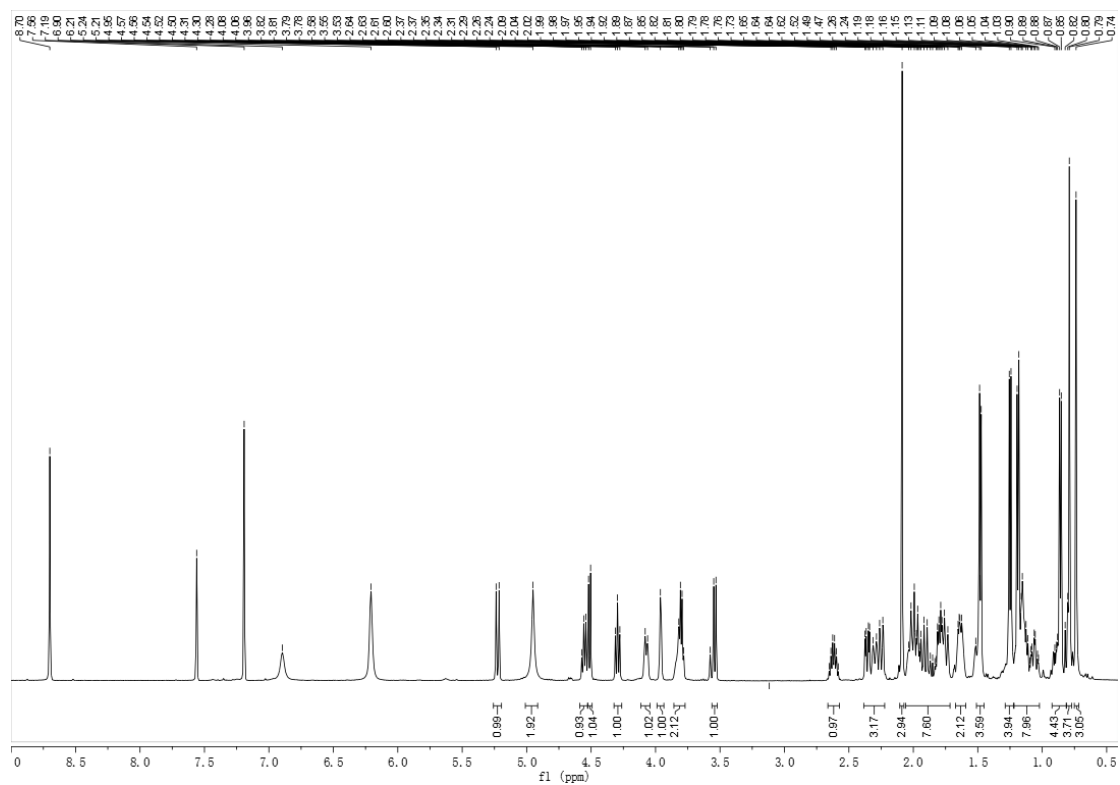Fig. S25.  $^1\text{H}$  NMR spectrum of compound **4** in pyridine- $d_5$ .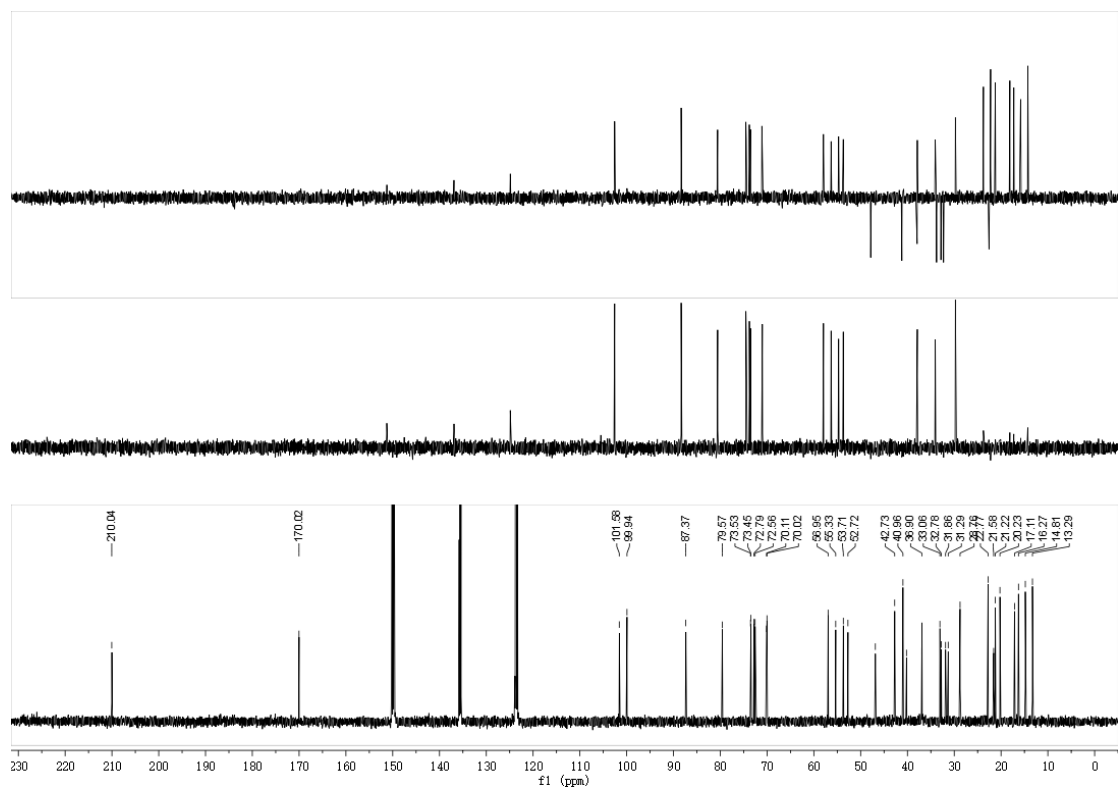Fig. S26.  $^{13}\text{C}$  NMR spectrum of compound **4** in pyridine- $d_5$ .



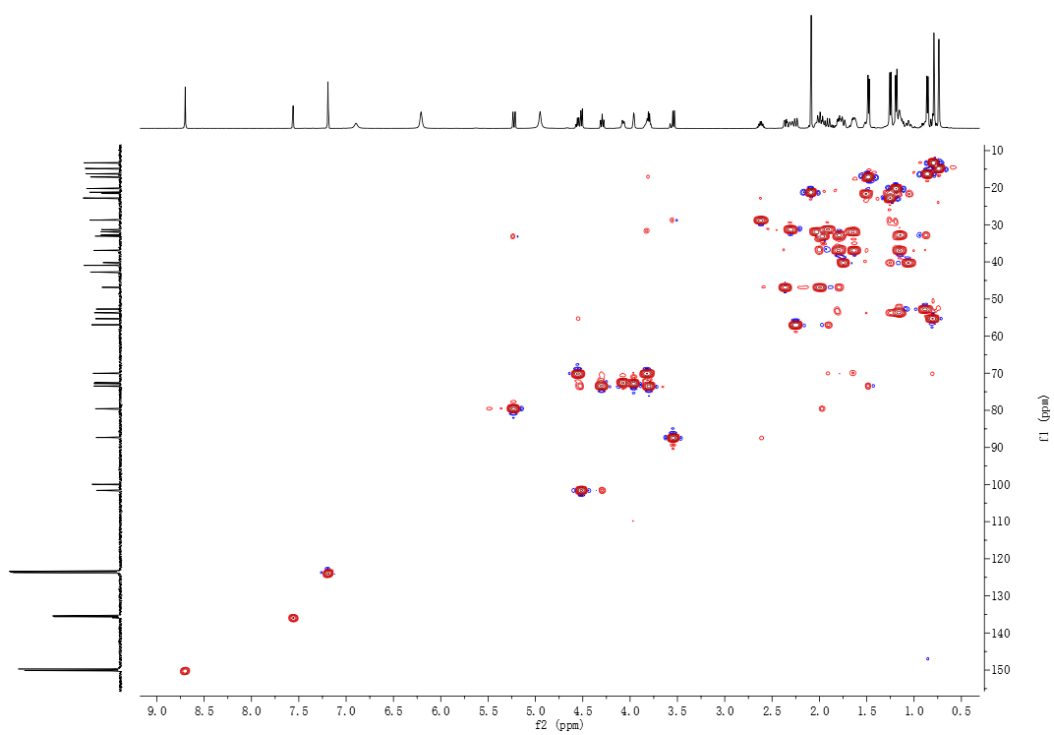

Fig. S27. HSQC spectrum of compound 4.

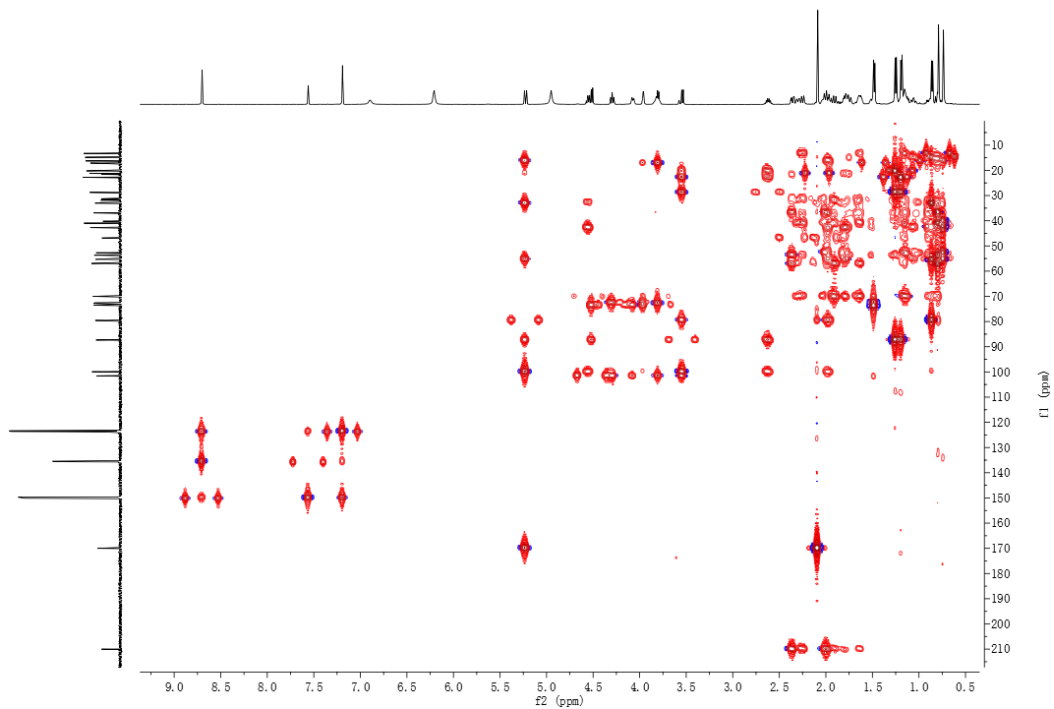

Fig. S28. HMBC spectrum of compound 4.

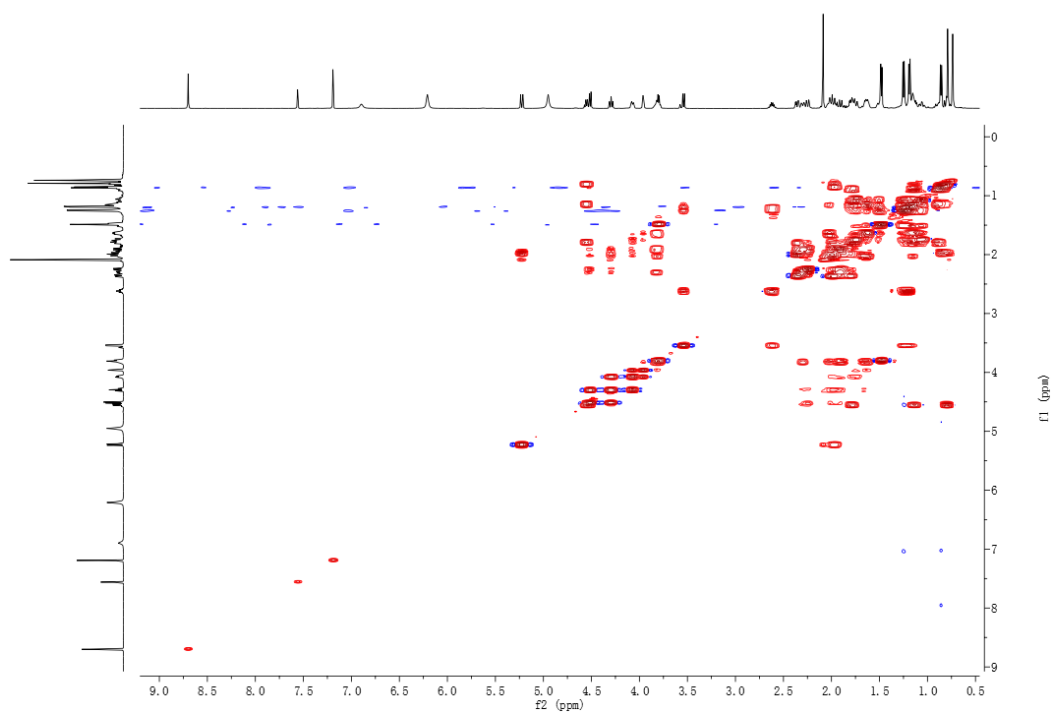

Fig.S29.  $^1\text{H}$ - $^1\text{H}$  COSY spectrum of compound 4.

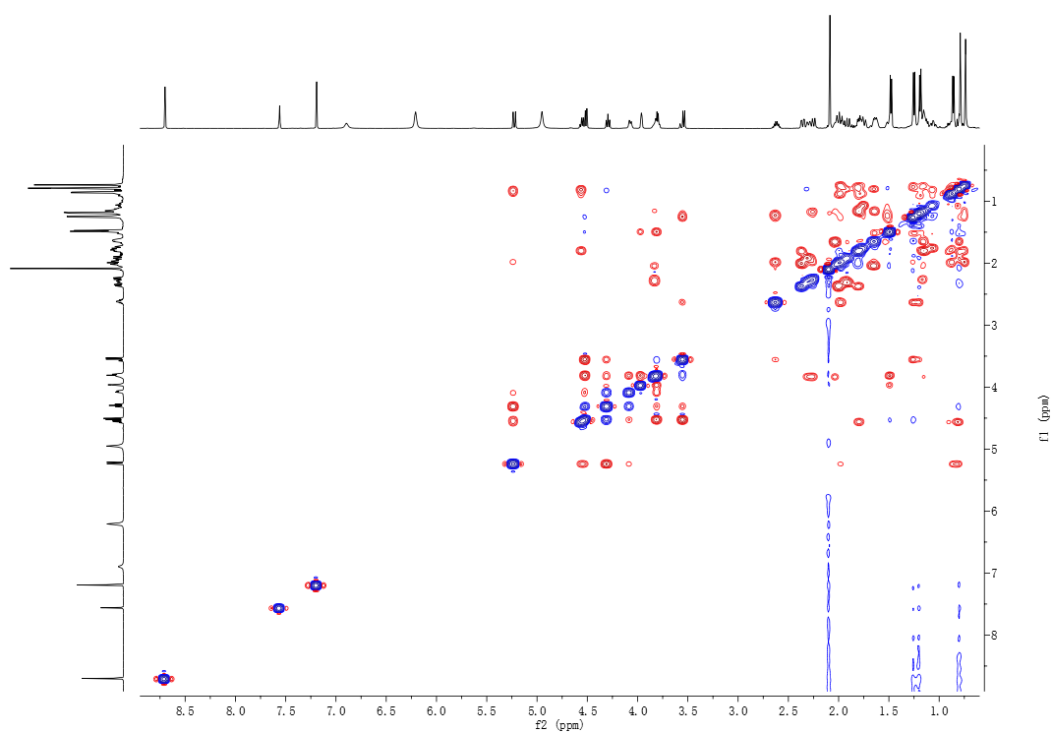

Fig. S30. ROESY spectrum of compound 4.

## User Spectra

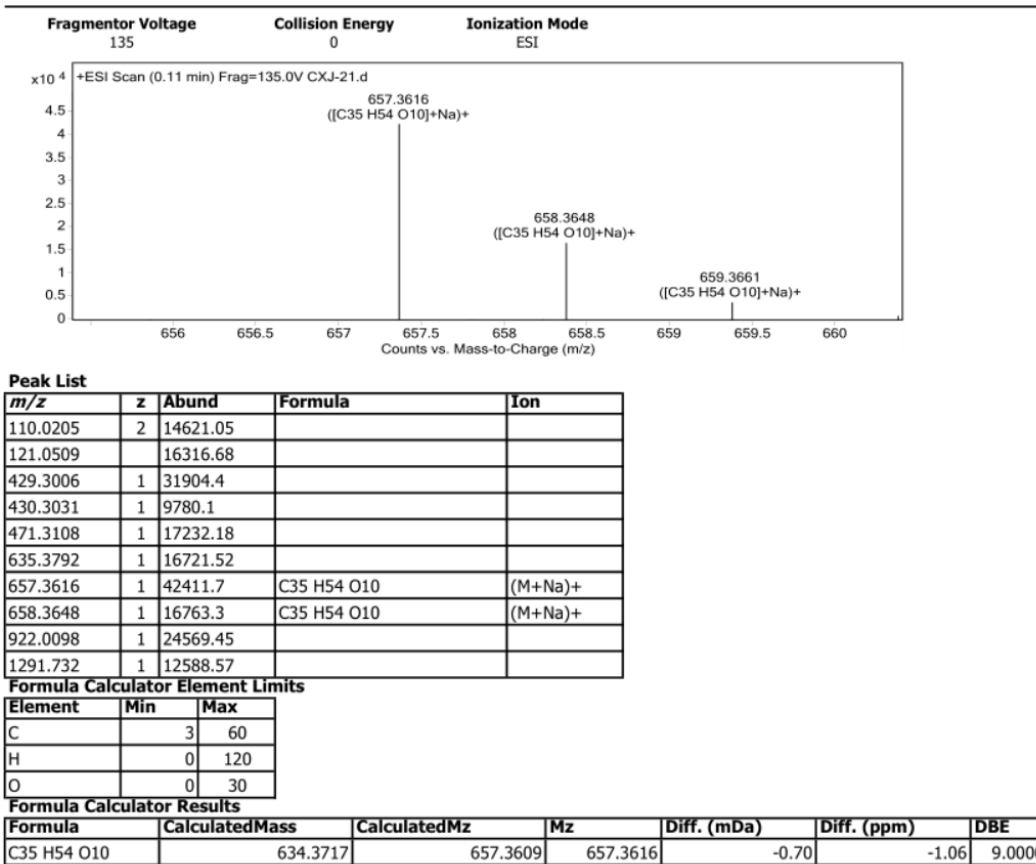

Fig. S31. HRESIMS spectrum of compound 4.

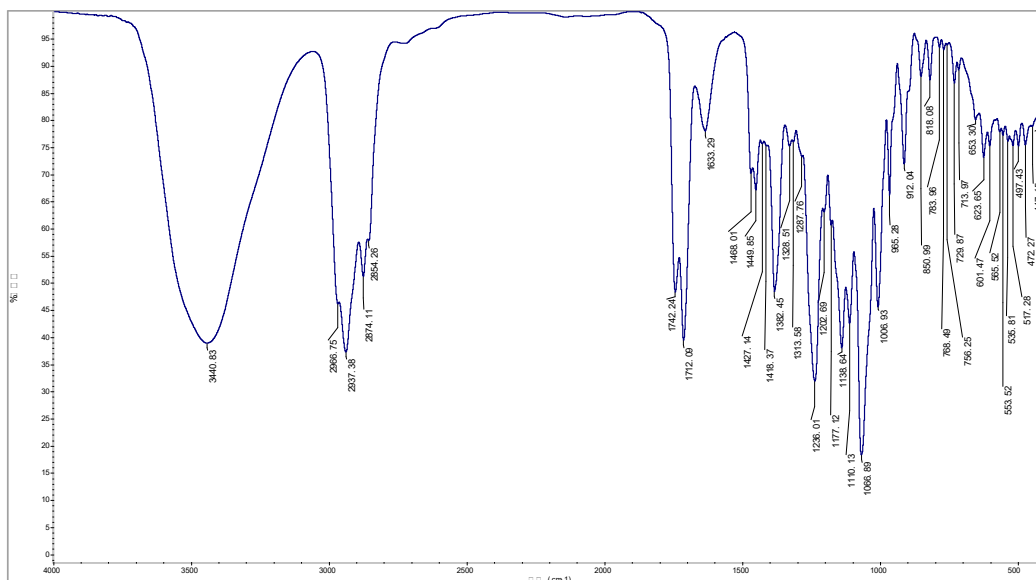

Fig. S32. IR spectrum of compound 4.

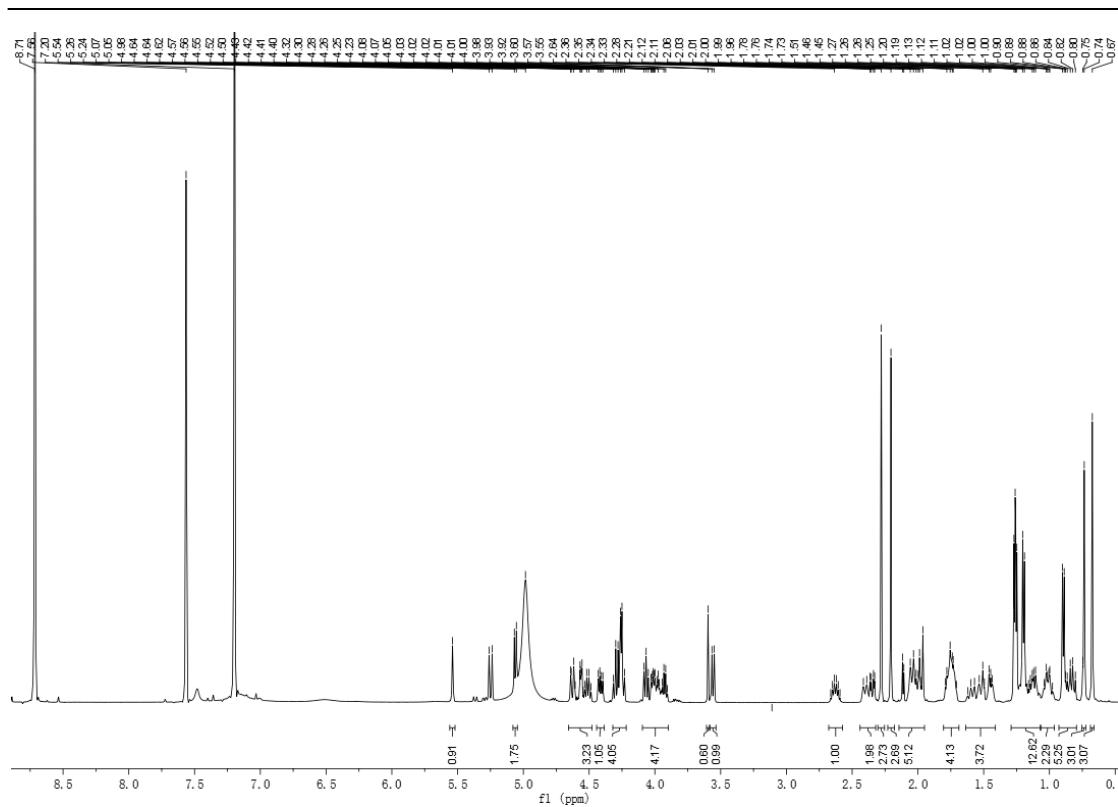

Fig. S33.  $^1\text{H}$  NMR spectrum of compound 5 in pyridine- $d_5$ .

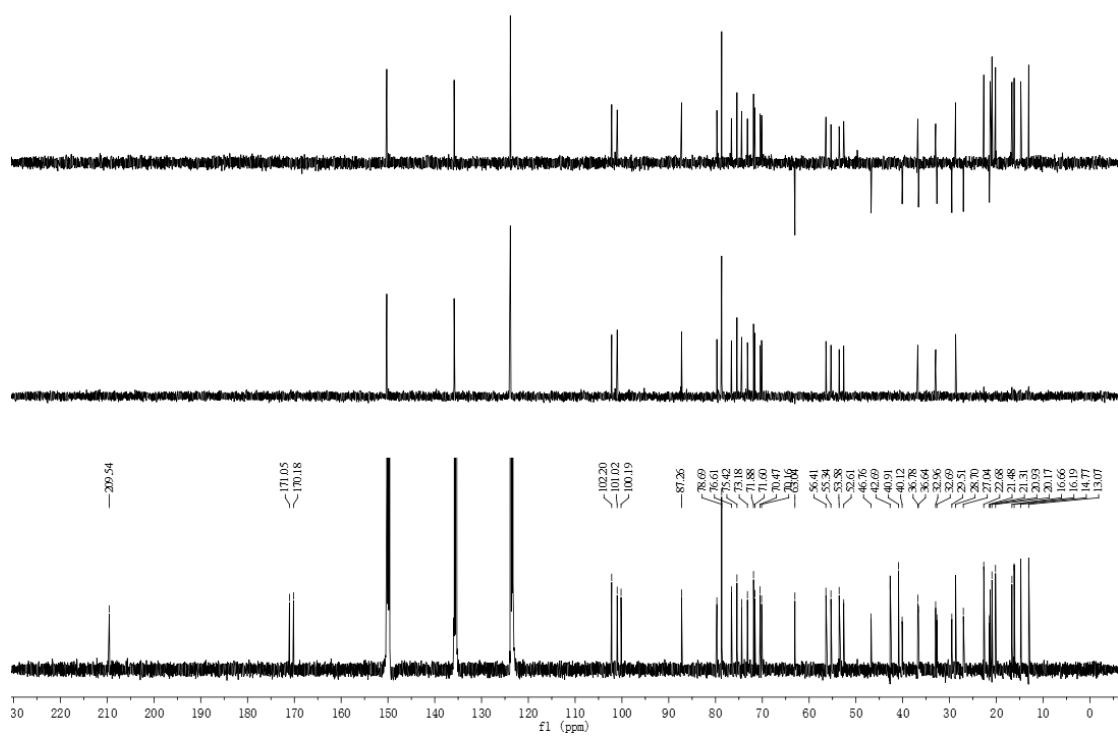

Fig. S34.  $^{13}\text{C}$  NMR spectrum of compound 5 in pyridine- $d_5$ .

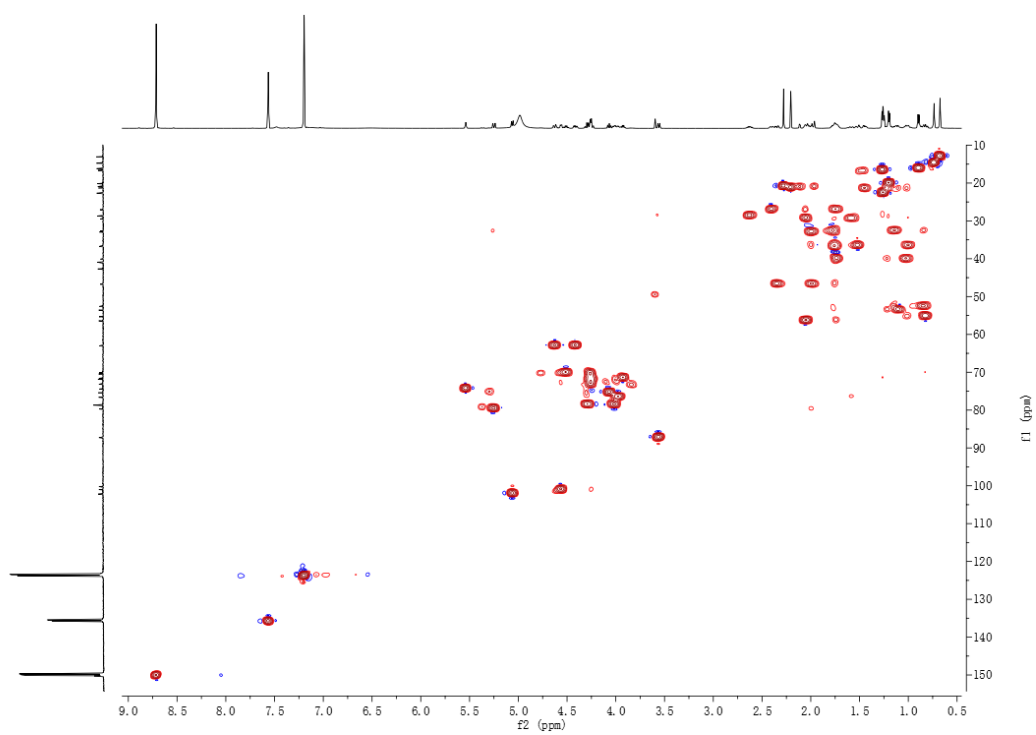

Fig. S35. HSQC spectrum of compound 5.

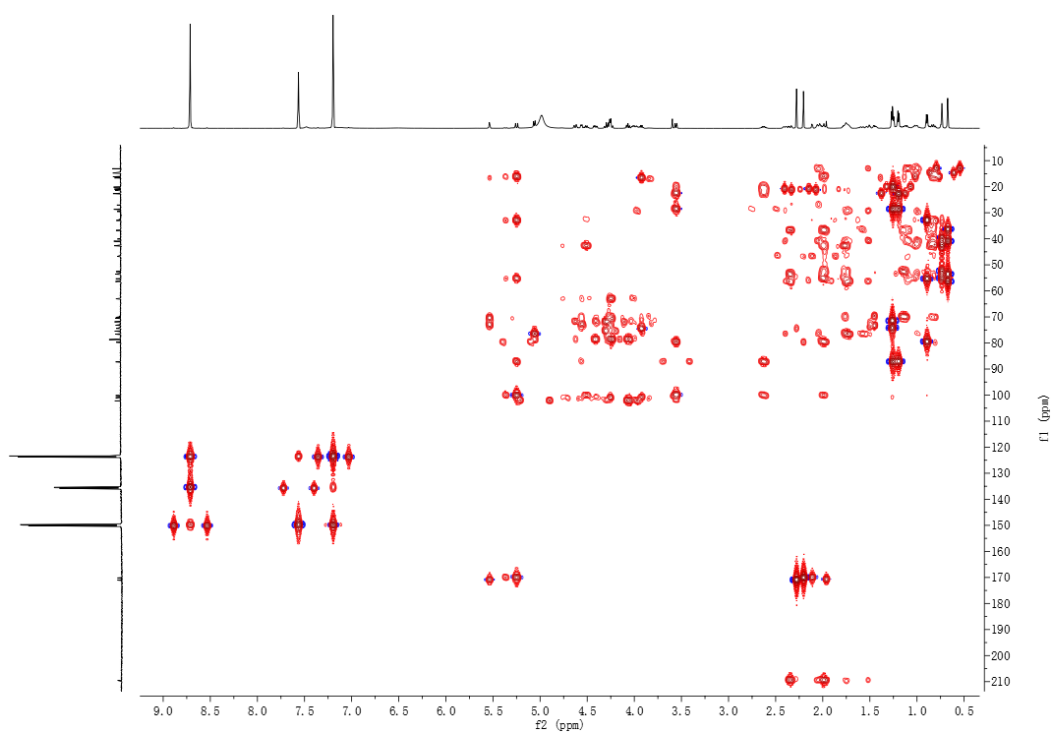

Fig. S36. HMBC spectrum of compound 5.

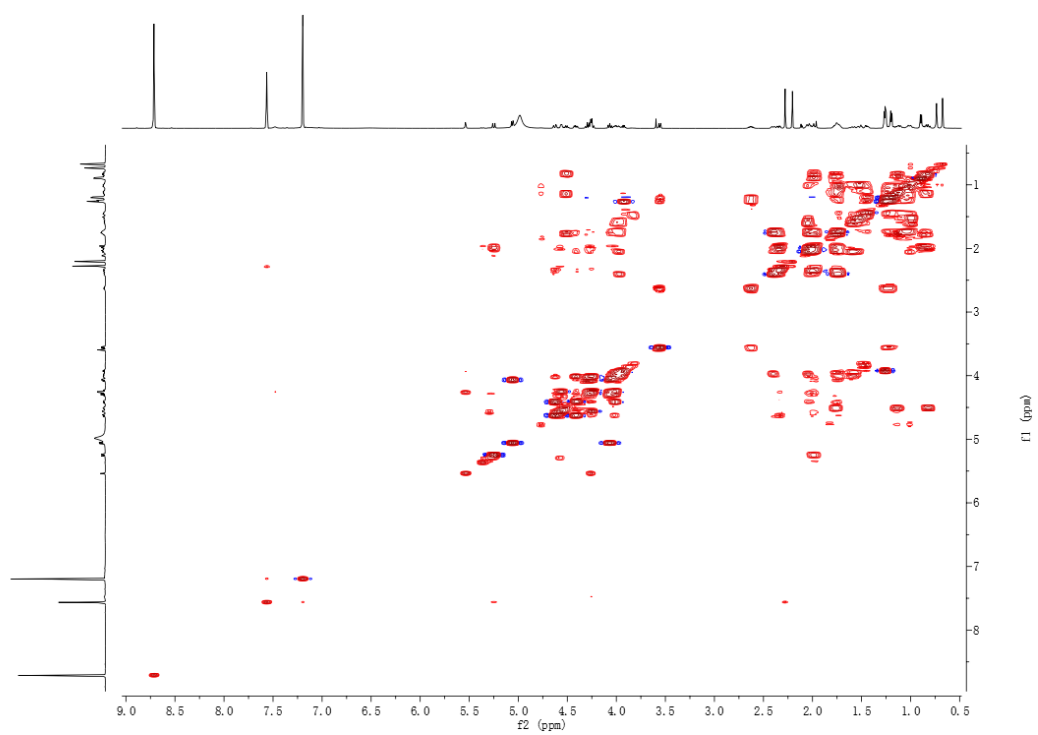

Fig. S37.  $^1\text{H}$ - $^1\text{H}$  COSY spectrum of compound 5.

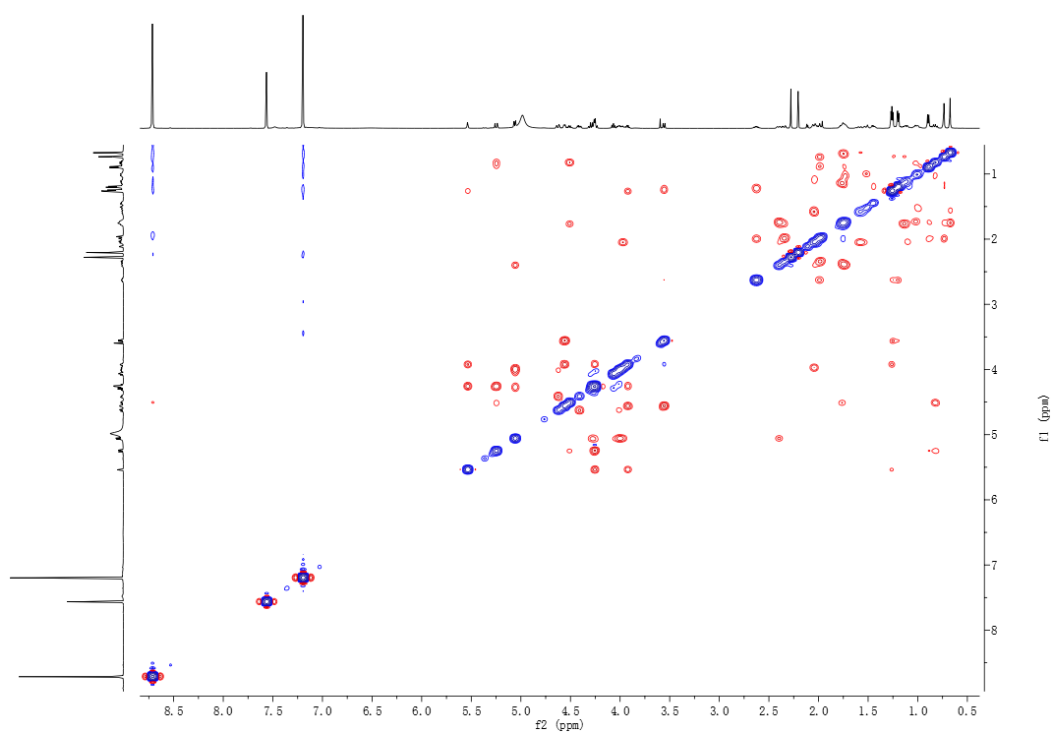

Fig. S38. ROESY spectrum of compound 5.

## User Spectra

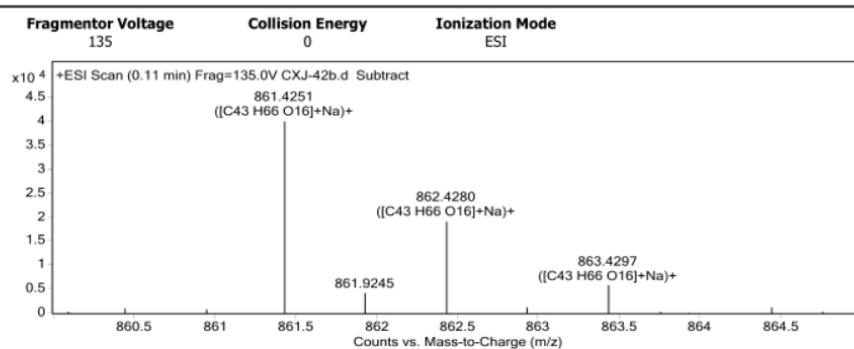

## Peak List

| m/z      | z | Abund    | Formula     | Ion     |
|----------|---|----------|-------------|---------|
| 231.0865 | 1 | 33109.54 |             |         |
| 429.3005 | 1 | 91842.64 |             |         |
| 430.3037 | 1 | 27346.28 |             |         |
| 471.3112 | 1 | 27208.01 |             |         |
| 591.3533 | 1 | 45325.41 |             |         |
| 633.364  | 1 | 29771.33 |             |         |
| 635.3787 | 1 | 29928.3  |             |         |
| 677.3898 | 1 | 43686.63 |             |         |
| 839.4434 | 1 | 59195.44 |             |         |
| 861.4251 | 1 | 40074.09 | C43 H66 O16 | (M+Na)+ |

## Formula Calculator Element Limits

| Element | Min | Max |
|---------|-----|-----|
| C       | 3   | 60  |
| H       | 0   | 120 |
| O       | 0   | 30  |

## Formula Calculator Results

| Formula     | CalculatedMass | CalculatedMz | Mz       | Diff. (mDa) | Diff. (ppm) | DBE     |
|-------------|----------------|--------------|----------|-------------|-------------|---------|
| C43 H66 O16 | 838.4351       | 861.4243     | 861.4251 | -0.80       | -0.93       | 11.0000 |

Fig. S39. HRESIMS spectrum of compound 5.

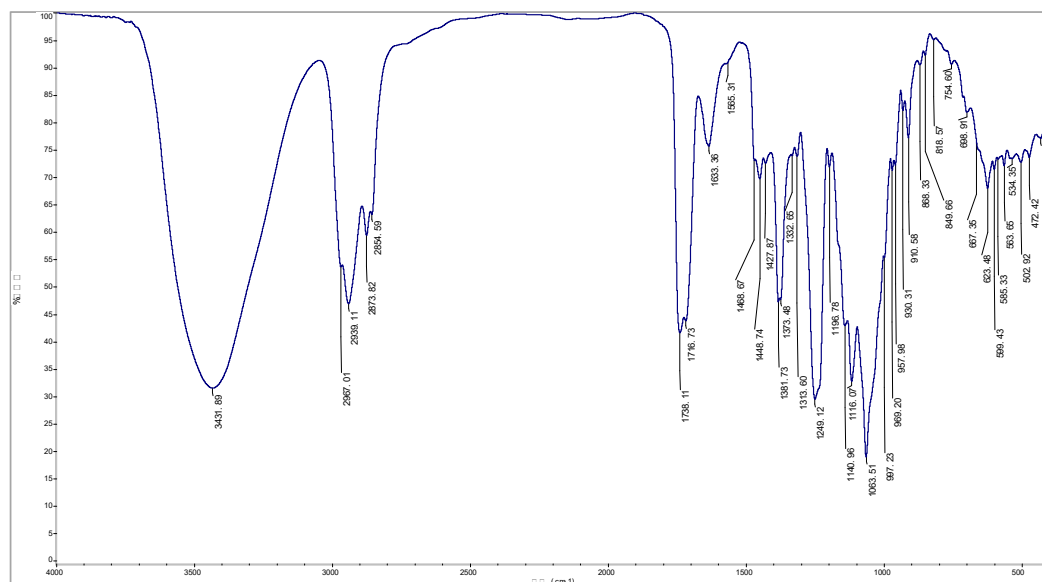

Fig. S40. IR spectrum of compound 5.

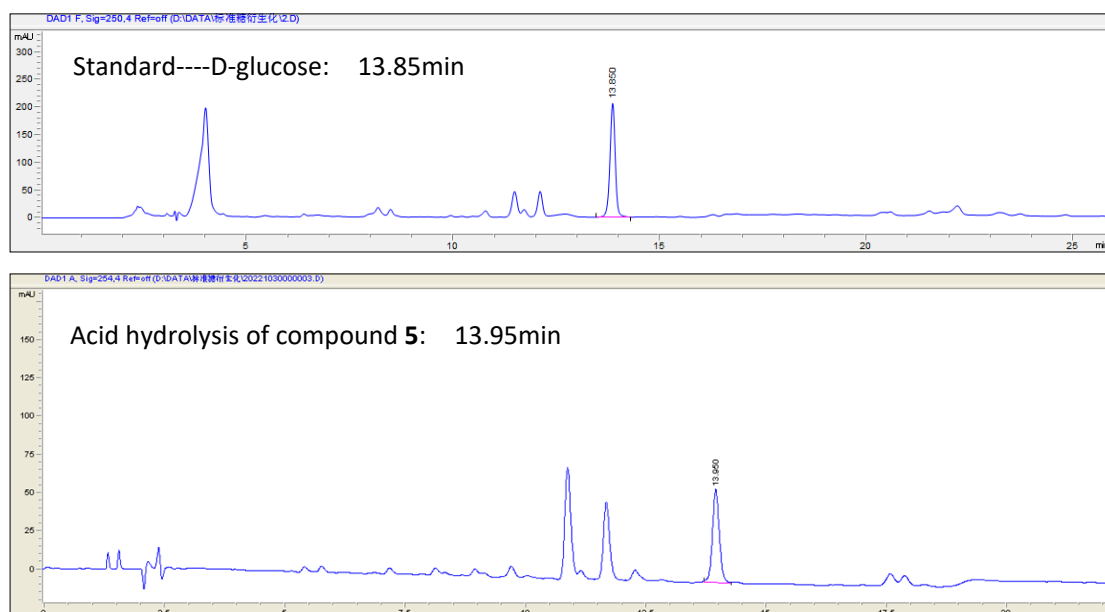

Fig. S41. Acid hydrolysis of compound 5.

Table S1. X-ray crystallographic data for 1

|                                 |                                                 |                    |
|---------------------------------|-------------------------------------------------|--------------------|
| Identification code             | global                                          |                    |
| Empirical formula               | C <sub>34</sub> H <sub>56</sub> O <sub>10</sub> |                    |
| Formula weight                  | 624.78                                          |                    |
| Temperature                     | 100(2) K                                        |                    |
| Wavelength                      | 1.54178 Å                                       |                    |
| Crystal system                  | Monoclinic                                      |                    |
| Space group                     | P 1 21 1                                        |                    |
| Unit cell dimensions            | a = 12.2949(3) Å                                | α = 90°.           |
|                                 | b = 9.7000(2) Å                                 | β = 110.8410(10)°. |
|                                 | c = 14.6302(3) Å                                | γ = 90°.           |
| Volume                          | 1630.65(6) Å <sup>3</sup>                       |                    |
| Z                               | 2                                               |                    |
| Density (calculated)            | 1.272 Mg/m <sup>3</sup>                         |                    |
| Absorption coefficient          | 0.752 mm <sup>-1</sup>                          |                    |
| F(000)                          | 680                                             |                    |
| Crystal size                    | 0.480 x 0.450 x 0.190 mm <sup>3</sup>           |                    |
| Theta range for data collection | 3.23 to 72.47°.                                 |                    |
| Index ranges                    | -15 ≤ h ≤ 15, -11 ≤ k ≤ 11, -17 ≤ l ≤ 18        |                    |
| Reflections collected           | 30722                                           |                    |
| Independent reflections         | 6401 [R(int) = 0.0363]                          |                    |
| Completeness to theta = 72.47°  | 99.5 %                                          |                    |
| Absorption correction           | Semi-empirical from equivalents                 |                    |



|                                   |                                             |
|-----------------------------------|---------------------------------------------|
| Max. and min. transmission        | 0.87 and 0.71                               |
| Refinement method                 | Full-matrix least-squares on F <sup>2</sup> |
| Data / restraints / parameters    | 6401 / 1 / 412                              |
| Goodness-of-fit on F <sup>2</sup> | 1.046                                       |
| Final R indices [I>2sigma(I)]     | R1 = 0.0279, wR2 = 0.0702                   |
| R indices (all data)              | R1 = 0.0280, wR2 = 0.0703                   |
| Absolute structure parameter      | -0.02(3)                                    |
| Largest diff. peak and hole       | 0.217 and -0.181 e.Å <sup>-3</sup>          |

**Table S2.** X-ray crystallographic data for **2**

|                                   |                                               |          |
|-----------------------------------|-----------------------------------------------|----------|
| Identification code               | global                                        |          |
| Empirical formula                 | C32 H52 O9                                    |          |
| Formula weight                    | 580.73                                        |          |
| Temperature                       | 100(2) K                                      |          |
| Wavelength                        | 1.54178 Å                                     |          |
| Crystal system                    | Orthorhombic                                  |          |
| Space group                       | P2 <sub>1</sub> 2 <sub>1</sub> 2 <sub>1</sub> |          |
| Unit cell dimensions              | a = 6.70730(10) Å                             | α = 90°. |
|                                   | b = 11.6828(3) Å                              | β = 90°. |
|                                   | c = 38.5757(8) Å                              | γ = 90°. |
| Volume                            | 3022.79(11) Å <sup>3</sup>                    |          |
| Z                                 | 4                                             |          |
| Density (calculated)              | 1.276 Mg/m <sup>3</sup>                       |          |
| Absorption coefficient            | 0.747 mm <sup>-1</sup>                        |          |
| F(000)                            | 1264                                          |          |
| Crystal size                      | 0.540 x 0.030 x 0.010 mm <sup>3</sup>         |          |
| Theta range for data collection   | 2.29 to 72.38°.                               |          |
| Index ranges                      | -8 ≤ h ≤ 6, -14 ≤ k ≤ 14, -47 ≤ l ≤ 47        |          |
| Reflections collected             | 27775                                         |          |
| Independent reflections           | 5969 [R(int) = 0.0969]                        |          |
| Completeness to theta = 72.38°    | 100.0 %                                       |          |
| Absorption correction             | Semi-empirical from equivalents               |          |
| Max. and min. transmission        | 0.99 and 0.88                                 |          |
| Refinement method                 | Full-matrix least-squares on F <sup>2</sup>   |          |
| Data / restraints / parameters    | 5969 / 0 / 381                                |          |
| Goodness-of-fit on F <sup>2</sup> | 1.041                                         |          |
| Final R indices [I>2sigma(I)]     | R1 = 0.0372, wR2 = 0.0845                     |          |
| R indices (all data)              | R1 = 0.0479, wR2 = 0.0898                     |          |

|                              |                                    |
|------------------------------|------------------------------------|
| Absolute structure parameter | 0.14(9)                            |
| Largest diff. peak and hole  | 0.267 and -0.238 e.Å <sup>-3</sup> |

**Table S3.** X-ray crystallographic data for **3**

|                                   |                                                                                                            |
|-----------------------------------|------------------------------------------------------------------------------------------------------------|
| Identification code               | global                                                                                                     |
| Empirical formula                 | C34 H58 O11                                                                                                |
| Formula weight                    | 642.80                                                                                                     |
| Temperature                       | 100(2) K                                                                                                   |
| Wavelength                        | 1.54178 Å                                                                                                  |
| Crystal system                    | Monoclinic                                                                                                 |
| Space group                       | P 1 21 1                                                                                                   |
| Unit cell dimensions              | a = 12.0479(3) Å      α = 90°.<br>b = 7.6358(2) Å      β = 94.9550(10)°.<br>c = 17.9880(5) Å      γ = 90°. |
| Volume                            | 1648.63(8) Å <sup>3</sup>                                                                                  |
| Z                                 | 2                                                                                                          |
| Density (calculated)              | 1.295 Mg/m <sup>3</sup>                                                                                    |
| Absorption coefficient            | 0.781 mm <sup>-1</sup>                                                                                     |
| F(000)                            | 700                                                                                                        |
| Crystal size                      | 0.450 x 0.220 x 0.130 mm <sup>3</sup>                                                                      |
| Theta range for data collection   | 3.68 to 72.36°.                                                                                            |
| Index ranges                      | -14 ≤ h ≤ 14, -9 ≤ k ≤ 9, -21 ≤ l ≤ 16                                                                     |
| Reflections collected             | 19289                                                                                                      |
| Independent reflections           | 6224 [R(int) = 0.0359]                                                                                     |
| Completeness to theta = 72.36°    | 99.3 %                                                                                                     |
| Absorption correction             | Semi-empirical from equivalents                                                                            |
| Max. and min. transmission        | 0.91 and 0.68                                                                                              |
| Refinement method                 | Full-matrix least-squares on F <sup>2</sup>                                                                |
| Data / restraints / parameters    | 6224 / 1 / 417                                                                                             |
| Goodness-of-fit on F <sup>2</sup> | 1.056                                                                                                      |
| Final R indices [I > 2σ(I)]       | R1 = 0.0285, wR2 = 0.0726                                                                                  |
| R indices (all data)              | R1 = 0.0289, wR2 = 0.0731                                                                                  |
| Absolute structure parameter      | 0.03(4)                                                                                                    |
| Largest diff. peak and hole       | 0.245 and -0.207 e.Å <sup>-3</sup>                                                                         |
